# Supplementary material
Source: publisher figshare collection journal article supplement (https://gsajournals.figshare.com/ndownloader/files/25545833)
Supplement: Supplementary file 1 [file 25545833]

## Sheet: Table S1
Table S1. Primers used in this paper.
Primer description	Gene or marker name/ID	Position (Mb)	Forward primer (5'-3')	Reverse primer (5'-3')
Polymorphism markersa	NAU1167	A03:2.64378	CTGACTTGGACCGAGAACTT	AAGAGCCCTGGACAATGATA
	NAU5444	A03:3.199965	TGAAATGAACCTCAAACTCCT	TCAAGAACCAAGGAAGAACC
	NAU10094	A03:5.600073	CAAGGTCGTCGAATTTAGCC	AACGTTTTCCATGCCCTCTA
	NAU7962	A03:5.865484	TGCAGAAGGCACTAAGAGCA	GCAGAAGTGAAGAGACAAGCG
	NBRI_Gh_C_1729	A03:6.50633	AACCCGTTGAAGTATGGTCG	ATGCATCTGCTCCAGCTTTT
	NBRI_Gh_L015	A03:7.355854	GAGTTTGGCTCCGAGTTGAG	GCGAGTGAACTCACCGATAA
	DPL0224	A03:9.603184	GAAACCAACCCTCAGGTACAATTA	CAGACCTAGAGACAAGGTATTGGAA
	NAU8194	A03:10.131965	CACTTGTCACCTATGTTACCCAAA	CCATGGAAACAATTTGCTAGACC
	S3059	A03:12.063303	TGGATTCCTTCTCATTCTTGTCGCCAC	CTGACCCATCTCGCTGATTGACTTTCTC
	GhVacInv	A03:12.205636	AGATCTTTACGTACTTAGGTTTTTCACCCCCACT	TACGGACCATTTGGCCTCCTGGTTA
	NAU8454	A03:12.620243	TCAAGTTCAACCCACTCTGA	GTCCAAAAACCCATCAAAAG
	NAU5801	A03:14.148957	GTGGTCACTCTCACCAGTCA	GTGCAAGTTTGGAGCCTTAT
	NAU156	A03:18.355732	CGTCATAAACCGTGCTTGTG	GGCCACTTTAAGGCTGTCAC
	NAU3671	A03:27.188451	CACCAATTTTAAACTGCATCTG	ACAGTTGTCCCTGGTGACTT
	NAU3439	A03:30.693551	CTGCCAAAAATAACCCAAAG	TTCAGAAAAGGAATGGAAGG
	NAU3394	A03:33.472955	CCTGGGATTGGAACATACAT	CCAGAATATCTGCAGCAGTG
	NAU3021	A03:49.144659	GGAGGGGCTGAAAAGATAAT	CCAACTAGTCATCACCAGCA
	NAU7943	A03:49.705862	GGTGAACCAAATATGCCACC	GCTGCTCATTGGTATTGGCT
	NAU884	A03:57.158142	AGAGCTGGAGGACATAACAAA	CGCAGATAAAGGATGGATTT
	NAU8188	A03:74.227146	AGCACAAGAAAGAAGGAAGGAAG	GCTCAAAGACCTGAGTTTGATTCT
	NBRI_Gh_K034	A03:77.009152	GTGCCGTGGAAGCGTAGT	CCTGGGCAGTAGGAGAAGAA
	NAU1592	A03:80.397318	TTTTGATCCAAAGCCTTTTT	GATTCCCAATAGCACTACCG
	NAU10363	A03:82.554713	AAGTGAAGGGGGAGACAATA	GCAATAATGAAAAATTGGCA
	NAU5035	A03:86.599835	TCCTCTGCTTTCTCCATCTC	TAAATGGATTCTCCGACACC
	NAU004	A03:86.661849	TTATTCTCACAGCCGGAACC	TTCACCCTCTCGCTTCTCAT
	NAU7485	A03:87.958863	CTCTCGTTCACTCACCAGGA	TAACCCAAGTCAGGTCTCCC
	NAU1248	A03:88.973018	AATGTCAGCTGCCTATTTCC	AAGACAGGCGATGTCATCTT
	NAU1068	A03:90.952741	CCGTAGCTTCGTACCCACT	CTGGCTAAGAAGGAGCAGAC
	NAU796	A03:91.567256	CAACCGAGAAACCAACAGAT	TGTCTTCAATAGCTGGATGG
	NAU7042	A03:91.567341	TAAGCCTATCACTGTTCTTC	GCAGAGTTCATTCTCAGTAA
	NAU8324	A03:92.661691	GGTTCTGACGACGGAGGTAA	CCTGGAAGCTAAATCCCAAA
	NAU8209	A03:93.547452	CTGCAAAGAACATATGATGGAGAG	GAGTAAAGGTCATTTCATGTTGGC
	NAU1070	A03:94.274973	CCCTCCATAACCAAAAGTTG	ACCAACAATGGTGACCTCTT
	NAU8193	A03:94.665373	GCTGTCCTTATTGCCATGAAATC	GACCGGGTTTAGATAAAGACACC
Genomic ampliﬁcation for polymorphic analysisa	Gh_A03G0461	A03:10.189455/A03:10.189998	CCTTGCTCCCCTGTAAGTCA	ATGGCATATACTCCACGCTCT
	Gh_A03G0466	A03:10.243461	TGTTTGAGTTTTGGGACTGTAAG	CTTCTTTGGAGGTAGTGCCC
	Gh_A03G0472	A03:10.334029	TGAACAGAAAAGGATGGACG	TCTCCTTATCTGTGTTCATTTGC
	Gh_A03G0483	A03:10.600234	GCAACAGAGATGGTGGATGG	TTGTATGAGGTAAAGGTGTTCCA
	Gh_A03G0484	A03:10.616997/A03:10.617091/A03:10.617301	TCAAGCCATTCATCGGTAGC	GATGGGGATACGCAAATAGC
	Gh_A03G0485	A03:10.852393	TTTTAGGCAACTTTTCACGC	TGTTGTTGAAAGGACCCACG
		A03:10.854327	GCTTGCTATTCAATATCTGCCT	GATGCTTCCGTCATTGGTTTAT
	Gh_A03G0462	A03:10.202862/A03:10.202880	TGCTTTTATTGAGTTGGGGC	GAATTGGACAAATGGGTGTCC
	Gh_A03G0473	A03:10.354717	GTTGAGCAATCCAGAAAAGACA	ACTTTTGTCTCGGAGCATTTG
	Gh_A03G0475	A03:10.382481	GGACCCCATTTCATCCAGTT	ATCATTCAAGAGGGCAAAGC
		A03:10.383645	AACTAAAAAGCAGGCGTCAA	GGTAAGGTTAAGATTGCGGG
	Gh_A03G0479	A03:10.488340	TCGGCTGTTGGTGAGTAGGA	GAGGCTTCCATGATGCTAAAC
	Gh_A03G0486	A03:10.869306/A03:10.869451	GGAGCAGGTGGCGATGTTAT	TACCGTCCCAGTTTGTCTCA
		A03:10.873470/A03:10.873472/A03:10.874663	GAATTAGATTAGGACTCCCGCT	AGTTGATTCCCTTGGTACGAA
	Gh_A03G0487	A03:10.956646	GCAGATTCAGCATCATTTGGA	AAGGTCTTGGAGAACGCTAAC
		A03:10.961961	GCAGAAGCCCTAAATGAAACA	GCAGAGTTTGACACCAAGGAC
	Gh_A03G0489	A03:11.025170	GGGCTACATCCCTTCTCCTC	TTATTAGGTGCTGGAAGGGC
	Gh_A03G0494	A03:11.522033	TTCAACATAGCATTGGGAGG	GCTGCCTGGAGATTTGACAT
RT-PCR analysis for mitochondrial genesb	nad1(AMT85460.1)		GTTGCACCATCTTCAACTCTTC	CCTCAATGCCTGCTGACTTAC
	nad2(AMT85447.1)		ATGATTATCCGCCGTTAG	GAGTGCCATTTGATGAGT
	nad3 (AMT85475.1)		TAATCGGCGAGCCTCAGTAG	TAATGTAGGCATCGCTCTTTC
	nad4(AMT85451.1)		CCGTGCTAGGAAGCATTA	GAACACCCATCCAAACAA
	nad4L (AMT85469.1)		CGGAATCATAAGCTGAAGCG	CTGCCCCTGCCAACCAAGTA
	nad5(AMT85448.1)		TGCTATCTAAGAATTGCTCCAT	CAAAGGCATAATGATAAACA
	nad6 (AMT85449.1)		GGCGTCGAGAAAGATTTGAG	GAATGAATCGGAGTCAAGGAG
	nad7 (AMT85477.1)		CTAAGGGCGAAGGAGATGC	AGGTCCTGATCGAGCAACTAG
	nad9 (AMT85452.1)		AGCAAGAAGCGGAACTACAA	GCATTTCCTATTGATTTGTCCC
	sdh3(AMT85446.1)		GGGGAGCAGAGCAGTCAAAG	TTCCGTTTCGCGTTCTAATT
	sdh4 (AMT85458.1)		AAGCACCTTTCACTATTTCGG	CCCACTCATCAAGGCAGACA
	cob (AMT85463.1)		ATGACTATAAGGAACCAACGATTC	TCAGGCGTGCTCAGTCTCAG
	cox1 (AMT85456.1)		AGTAAGATCCTTGCGTTGACC	CAACGGAAGACATGGGAGTT
	cox2 (AMT85466.1)		TTCTACTCCCATGCTTTCCG	AGGCTCGTTCCGTACTTGAC
	cox3 (AMT85457.1)		TTACATACAACCGAGGCAAAG	GAGTGGGAAAGCAGCAGTAA
	atp1 (AMT85454.1)		CGGCATTCCTCCTTGACTC	CCTGTCTTTTCACCGCTCC
	atp4 (AMT85445.1)		AAACTCCCATGTCTTCCGTT	TAAAGAGCCACCGAATCAAC
	atp6 (AMT85470.1)		GGTTTTGCTATCGCTGGTTTA	GGCTTTACTTCCTCGCCTTA
	atp8 (AMT85472.1)		TTATTCTATGCTTTTCGTTGGTC	ACCAATCGCAATTCATCACC
	atp9 (AMT85474.1)		ATGTAGCCAAGCCCAAGAAA	GCCCGCTTCCCATTACTC
	ccmB (AMT85478.1)		CGGAGGTTGGTTGAAGATGA	GCTTACATACCCGGCTCAAC
	ccmC (AMT85450.1)		GGAAATCCTTTGATTGCGTAT	AACGAGTGTTGAGCGAGTGA
	ccmFC(AMT85480.1)		GCCGCCCTATTCTATTACC	CCTCCCAACGAAGCCAAC
	ccmFN (AMT85471.1)		AATCCTGCCACCTTTCTTGT	CATCTAGTGCAGTGGCTTGG
	rpl2 (AMT85461.1)		TATGTCAAAGGGACCAACGA	AGTAGCTCGACATCGGGAAT
	rpl5 (AMT85462.1)		GTTCGGGACGAAACCAGAGT	GACCTTGCTGCTTAGGACTTT
	rpl10 (AMT85473.1)		CGACGATGAAGGTTACGAAG	TTTCTTCCCGACCTATTTGAC
	rpl16 (AMT85467.1)		ACTGAATGCGGAAAGTATGG	TCTTTCCACTTCCGTCGTTC
	rps3 (AMT85468.1)		TCGGTTAATGCCTTTGTACG	TGTCCGCTCATAGCACGAT
	rps4 (AMT85465.1)		GTTCGATTCCCGTTATACGC	AAATGGATATGTCCCTATGAGC
	rps7 (AMT85459.1)		GAGGGAACGCAAAGAGTGAC	AATGAATGAAGGGAGGAGTATGA
	rps10 (AMT85455.1)		TTAAATTAGGCGGCAGGAG	CAGGAAAAGGTCAACGCAAG
	rps12 (AMT85476.1)		GGCAGTACCTCCCAACAAGAT	GTTCCAGAGGCATCTTCCAT
	rps14 (AMT85464.1)		CGACGATGAAGGTTACGAAG	TCTATTGGTTTGGTGGTTGC
	matR (AMT85479.1)		GCGACCATTCTCAAGAACCA	AACTAACGCAAGCCTACTCAAC
	mttB (AMT85453.1)		GGGACAAATCAATAGGAAATGC	GTATCACTCATCCCGCTCCT
	nad7 Exon1		ATGACGACTAGGAACAGGCAAATC	TCTAAACGATCAAAATAAGGTAA
	nad7 Exon2		AGGGACTGAGAAATTAATAGAGT	CTCTTAACATTACACCACTGAATC
	nad7 Exon3		ATGATGGCCCAAGAACACGCTCAT	TCCATGGATAGTTTCATTCGACA
	nad7 Exon4		TGCTGGGATTCGCGAAGAGCAGCA	TCTATCCACCTCTCCAAACACAAT
Endogenous control for RT-PCR analysis	18S rRNA(GeneID:24679539)		TCGCAAGACCGAAACTCA	CGCCAATAAGACCACCAA
Endogenous control for qRT-PCR analysis	18S rRNA(GeneID:24679539)		ACAATGGCAATTACAATGG	AGAGAACAATCCGAACTG
Endogenous control for RT-PCR and qRT-PCR analysis	EF1α		AGACCACCAAGTACTACTGCAC	CCACCAATCTTGTACACATCC
qRT-PCR analysis	GhIm		AATAGTTTGATTGGAATGTTGAAGCTGTTGG	TGACATGTAATTGGACTGAGCTTAAGTCCTTGTT
	GhImA		AATAGTTTGATTGGAATGTTGAAGCTGTTGGTT	TGACATGTAATTGGACTGAGCTTAAGTCCTTGTT
	GhImD		AATAGTTTGATTGGAATGTTGAAGCTGTTGGTC	TGACATGTAATTGGACTGAGCTTAAGTCCTTGTT
	nad7		CGACGAATTAGAAGAGAT	AACATTACACCACTGAAT
	AOX2		TGCAGTAGCAGCATCTGCAT	TCCACAGAAGCAGGAGAAGAG
	AOX1A		CCACCTATTGCTATTGATTA	CCTGATAATGTATATCCGATG
	ATPase subunit 1		CACGAATTTTCAAGTGGATG	CCTTCTTTAATAGCGGTATCA
	ATPase subunit 4		GGAGAATCCAGGCTATTCAG	GATCCTAAGTAATCGTTGTTGTTC
	ATPase subunit A		GAGGAATGTATAAACCAATGC	GGAGATGATTCCAAATAAATAGG
qRT-PCR analysis for mitochondrial genes exons and introns	nad1 exon1-2		GTATGGTATTGTCAGATTC	AATAGAGACTTCATAAGAGA
	nad1 exon2-3		GGTCTTATTCTTATTACTGT	GAGGAACATAACCAATAC
	nad1 exon3-4		AATTCGAGTGAGATTGTC	TTAAGATCATATTGGCAT
	nad1 exon4-5		TGATCTTAATGAGTGGTC	TCACCTTGATACTAAACC
	nad2 exon1-2		AATATGATTATCCGCCGTTAGT	GCAGAAGCAAGGTTATTAGAAC
	nad2 exon2-3		CTATTGCCCATTTATTCTG	GAGCACCAGTGATTTCGT
	nad2 exon3-4		TGGTGCTCGATCTAGTGG	TTGCCGTAATGCTGAAAC
	nad2 exon4-5		ACTAGCGTTATAGGTTGTTT	TATGAACTGAGTGCCATT
	nad4 exon1-2		TGGATCTTCTACTATTCTATGTT	CTGATATGCTGCCTTGAT
	nad4 exon2-3		ATATGAATCTGGTGACTAT	CTCCGTAATATCTAACAAG
	nad4 exon3-4		TTTCTTGTTGGACTTGTTT	GTTACTTACGGATGTATGC
	nad5 exon1-2		CTCGGTAGTGGAGTAGCA	GAATAAATATGGACCAAGCT
	nad5 exon2-3		CACTAAGTATACCATCAGTG	TACCTAAACCAATCATCA
	nad5 exon3-4		TGATGATTGGTTTAGGTA	TTGAAGTTGACTTATTCG
	nad5 exon4-5		AGGTGCTATTGAGATATTG	CAAAGGCATAATGATAAACA
	nad7 exon1-2		TCACGATCAGTATTGGAA	TTTCTCAGTCCCTCTATG
	nad7 exon2-3		AGGGACTGAGAAATTAATAGAG	CTACGGCTGAAGAATGAG
	nad7 exon3-4		GATTAGTGGATATTGGTA	ATACAGTAACGATCATAG
	nad7 exon4-5		GCTATGATCGTTACTGTA	AATGGTGAATTGAGGATT
	rps3 exon1-2		TCGGTTAATGCCTTTGTACG	TGTCCGCTCATAGCACGAT
	rps10 exon1-2		TTAAATTAGGCGGCAGGAG	CAGGAAAAGGTCAACGCAAG
	cox2 exon1-2		TTCTACTCCCATGCTTTCCG	AGGCTCGTTCCGTACTTGAC
	ccmFC exon1-2		GCTCCAATGAAGATGAATA	CGTTGAGTGAACTGTATC
	nad1 exon1-intron1		ATTATGGTATGGTATTGTC	CTATTGGTCCTAGTATCA
	nad1 exon2-intron2		TCTCTATTGGTCTTATTCT	GCTTAGTCAGTTATTCTC
	nad1 exon3-intron3		AGATATGGTCTGGTATTC	CAGTGGACTATTAAGGAT
	nad1 exon4-intron4		AGAGTATGCCAATATGAT	TAATCTTAGATAGGTCGT
	nad2 exon1-intron1		AATATGATTATCCGCCGTTA	GTGCCGCATTAGGTTAGG
	nad2 exon2-intron2		TATGTAATCGCAGCATCA	ATTAATAGATATCGGTAGTTGTC
	nad2 exon3-intron3		TGGATTCCTATTCAAGAT	TTAACATGCTATGGTCTC
	nad2 exon4-intron4		AGTAGTGACTAGCGTTAT	CCCTATCTTTCGTAGCAT
	nad4 exon1-intron1		CTGGTATGAGAAGTTATG	CGAATATAAGATGCTCAG
	nad4 exon2-intron2		TCATTGCTTACTCCTCAG	TTGTGTGTCCATAACTCA
	nad4 exon3-intron3		ATTCAAATGGCAGAGAAGTTTC	ATCGCAAGCACCTACAAC
	nad5 exon1-intron1		CTTGCTATCTAAGAATTG	GATCTGATCTATCTACTC
	nad5 exon2-intron2		TTAATACTTCTGGCTCTC	ACTTACTTATGGGCTAAC
	nad5 exon3-intron3		GATATGATGATTGGTTTAGGTA	ATGCGTCAGTTTGTGGAT
	nad5 exon4-intron4		TACACATTCCGACGATTG	GGTCATAACGCACTCTTC
	nad7 exon1-intron1		ATGAACGGAGAAGTGGTGG	GCGGTTCGCTTGAGTTGC
	nad7 exon2-intron2		GGACTGAGAAATTAATAGAG	ATATGTCACTTAGTCATCT
	nad7 exon3-intron3		AACAACGATTAGTGGATAT	TTGCTATCAATGTCTTCA
	nad7 exon4-intron4		TATGTCCTCCATCACGAT	TGAGTCTCGGTTAAGAAC
	rps3 exon1-intron1		GTAAGACTTGAGAAGAATC	AAATATAGGACAAACTGAAG
	rps10 exon1-intron1		AGAAGTTCTTTCGGTTAA	TTAAGGTAAGGTAAAGGG
	cox2 exon1-intron1		AGAAGGAGTTTACTATGGTCAG	CAGTCGGCCTATGTTTCC
	ccmFC exon1-intron1		AAAGCTCCAATGAAGATGAAT	CCACAGGTCGCACATAAG
sgRNA synthesis	sgRNA		ATTGAACGGAGTGAACTATTTCT	AAACAGAAATAGTTCACTCCGTT
Detection of genome editing	GhIm		ggagtgagtacggtgtgcAATCGCTTCTATCCTCAGTA	gagttggatgctggatggCTTGCCCAGTTGAAGAAA
20 representative genes for correlation analysis between RNA-seq data and qRT-PCR	Dihydroflavonol 4-reductase		AATGTTCCCACCAAGTTCAA	CATGTCTCGACAGCTCCTAC
	Fasciclin-like arabinogalactan		GTCCCCGGAGAATTCACCTT	CAATCGGAATCTCTCACCGTTAG
	HERK1		CTCTCCGGTGTTTCAATGAGT	GTGGCAAGCTGTAATGGATCA
	CelA2		CTGTTGTTGCGGAGGTTCTA	TTTGCCCATCATCTTCTTCTTCT
	CelA5		TTACCACTTCTCGCCTATTGT	GCTTACTCCACTCCACCTTA
	CESA4B		TGCCACTATTGTTGATTTGC	TCACACATTTTGCTCTTGC
	CESA7B		TGAACAAACAAGAATGGAGATG	ATTGGAATGCTGTAGAGAACA
	CESA8B		GCAAGTAAGTGGACTGAAAC	AGTTCATAGCATTGTTTAGGAAA
	COBL9		TTCAATCGGAGGTGCTTCTTC	GCTGCCAAACCGGAGAATAG
	COBL13		CACTGGCATGTCAAGCTC	CTCCATAGCGTGTAGTTCATC
	CTL2		TGCCTTGCCTATCTACTG	GTCATCCACCTCCACATT
	FLA5		AATACTCCGTCTTCGTTCGT	TCTTCCCATCATCTGTGTCT
	FLA6		GCTTCAGTTGGTTCAGTTC	GTCACATTCACTTGGTTCC
	GLU		ATAAGCCGCACCACCGAACT	AACGGGAAAGCCGATGAGAA
	Methyltransferase-like		CAATATCCCAGGAGCCAAGT	CCCACAGATCCACCAAACAT
	Suc2		ATTAGTGGACCGATAGATGC	TGTTTTGGGATTGGGAAGTG
	Thaumatin-like		TCAAAGGCTCAGGCAAATGT	AGCCACCACTCGCTTGTTAT
	Jp650-like		CCAAGGTTAGGGGTTATGAA	TCCAAGGGCTAGAAAGGCAC
	IRX7		GGTGATAATAGCCGATGGTA	TCTGGATGGTTGACAAATTG
	IRX10		TCAATCACAATTCCTCCTTATGC	GCGTAGTAGCCACCTTCA
RNA-Pull down	NAD7	sense	TAATACGACTCACTATAGGGCTAAGGGCGAAGGAGATG	AGGTCCTGATCGAGCAAC
	NAD7	antisense	TAATACGACTCACTATAGGG AGGTCCTGATCGAGCAAC	CTAAGGGCGAAGGAGATG
Subcellular localization for GhIm	GhIm		ATTTACGAACGATAGGGTACCATGCGTTTATCTTCAAAGCA	GCCCTTGCTCACCATGGATCCCACTTGACAAGCAACTCCGC
Virus induced gene silencing assay for GhIm	GhIm		TAAGGTTACCGAATTCTCTAGAAACTGGGCAAGTCAGCAATC	GCGTGAGCTCGGTACCGGATCCGGGCTACATCCCTTCTCCTC
a. Polymorphism markers or genes information was referred to G. hirsutum acc. TM-1 from Zhang et al. (2015).
b. Genes information was referred to G. raimondii mitochondrial genome database (GenBank: KR736345.1).

## Sheet: Table S2
Table S2. Predicted genomic polymorphic loci between TM-1 and the im mutant.
Position on Chr. A03a	REF	ALT	FILTER	Variation type	INFO	Gene ID	Annotation
10189455	A	ATATATATC	PASS	Intron_variant	MODIFIER	Gh_A03G0461	Nodulin MtN3 family protein
10189998	TGCAG	TG	PASS	Splice_acceptor_variant&splice_region_variant&intron_variant	HIGH	Gh_A03G0461
10202862	T	G	PASS	Intron_variant	MODIFIER	Gh_A03G0462	Pseudouridine synthase family protein
10202880	G	A	PASS	Intron_variant	MODIFIER	Gh_A03G0462
10243461	TGCAG	TG	PASS	Splice_acceptor_variant&splice_region_variant&intron_variant	HIGH	Gh_A03G0466	Ribosomal protein L7Ae/L30e/S12e/Gadd45 family protein
10243464	AG	AGAAATG	PASS	Frameshift_variant&splice_region_variant	HIGH	Gh_A03G0466
10334029	TG	T	PASS	Frameshift_variant	HIGH	Gh_A03G0472
10354717	GGT	G	PASS	Splice_donor_variant&intron_variant	HIGH	Gh_A03G0473
10382481	C	CAG	PASS	Splice_acceptor_variant&intron_variant	HIGH	Gh_A03G0475	FRIGIDA-like protein
10383645	C	T	PASS	Splice_donor_variant&intron_variant	HIGH	Gh_A03G0475
10417008	CA	CATA	PASS	Splice_acceptor_variant&intron_variant	HIGH	Gh_A03G0476	NADPH/respiratory burst oxidase protein D
10417106	G	T	PASS	Stop_gained	HIGH	Gh_A03G0476
10417242	G	T	PASS	Splice_acceptor_variant&intron_variant	HIGH	Gh_A03G0476
10421216	AGTC	AGTCTGTC	PASS	Splice_donor_variant&intron_variant	HIGH	Gh_A03G0476
10477826	GC	G	PASS	Frameshift_variant	HIGH	Gh_A03G0478	TUDOR-SN protein 1
10488340	CCCTGC	CC	PASS	Splice_acceptor_variant&splice_region_variant&intron_variant	HIGH	Gh_A03G0479
10600234	GG	GGCG	PASS	Splice_donor_variant&intron_variant	HIGH	Gh_A03G0483
10616997	G	C	PASS	Stop_gained	HIGH	Gh_A03G0484	Sec14p-like phosphatidylinositol transfer family protein
10617091	C	T	PASS	Splice_donor_variant&intron_variant	HIGH	Gh_A03G0484
10617301	A	T	PASS	Splice_donor_variant&intron_variant	HIGH	Gh_A03G0484
10852393	G	A	PASS	Intron_variant	MODIFIER	Gh_A03G0485	Calcium-dependent phospholipid-binding Copine family protein
10854327	T	C	PASS	Splice_acceptor_variant&intron_variant	HIGH	Gh_A03G0485
10869306	G	A	PASS	Intron_variant	MODIFIER	Gh_A03G0486	transducin family protein / WD-40 repeat family protein
10869451	C	T	PASS	Intron_variant	MODIFIER	Gh_A03G0486
10873470	A	C	PASS	Intron_variant	MODIFIER	Gh_A03G0486
10873472	A	C	PASS	Intron_variant	MODIFIER	Gh_A03G0486
10874663	ATAC	A	PASS	Splice_donor_variant&splice_region_variant&intron_variant	HIGH	Gh_A03G0486
10956646	GTC	GTCTC	PASS	Splice_acceptor_variant&intron_variant	HIGH	Gh_A03G0487	Glycosyl hydrolase family 38 protein
10961961	A	G	PASS	Intron_variant	MODIFIER	Gh_A03G0487
11012340	A	G	PASS	Intron_variant	MODIFIER	Gh_A03G0488	ARF-GAP domain 1
11017154	T	G	PASS	Intron_variant	MODIFIER	Gh_A03G0488
11025170	AAGTTATTACAACAAGCCAAACCAG	AAG	PASS	Frameshift_variant	HIGH	Gh_A03G0489	Pentatricopeptide repeat (PPR) superfamily protein
11522033	G	GTT	PASS	Splice_donor_variant&intron_variant	HIGH	Gh_A03G0494	Protein kinase superfamily protein
11616338	G	T	PASS	Splice_donor_variant&intron_variant	HIGH	Gh_A03G0497	P-loop containing nucleoside triphosphate hydrolases superfamily protein
11616635	T	A	PASS	Intron_variant	MODIFIER	Gh_A03G0497
11622111	TGCAG	TG	PASS	Splice_acceptor_variant&splice_region_variant&intron_variant	HIGH	Gh_A03G0497
a. Genes information was referred to G. hirsutum acc. TM-1 from Zhang et al. (2015).

## Sheet: Table S3
Table S3. Detection on polymorphic loci during target region in Chr. A03 in im mutant and three different cotton accessions with fluffy fiber genotype
SNPs or InDels position (bp)	Gene ID	TM-1 (At/Dt)	im (At/Dt)	CSIL028 (At/Dt)	I4005 (At/Dt)
10189455	Gh_A03G0461	A/A	ATATATATC/A	ATATC/A	ATATATATC/A
10961961	Gh_A03G0487	A/A	G/A	G/A	G/A
11025170	Gh_A03G0489	AAGTTATTACAACAAGCCAAACCAG/AAGTTATTACAACAAACCAAACCAG	AAG/AAGTTATTACAACAAACCAAACCAG	AAGTTATTACAACAAGCCAAACCAG/AAGTTATTACAACAAACCAAACCAG	AAGTTATTACAACAAGCCAAACCAG/AAGTTATTACAACAAACCAAACCAG
The positions of SNPs or InDels were referred to the genomic database of G. hirsutum acc. TM-1 (Zhang et al. 2015). At and Dt showed the A subgenome and D subgenome of polymorphic loci in allotetraploid cotton.

## Sheet: Table S4
Table S4. Gene ontology (GO) enrichment analysis of the differentially expressed genes between TM-1 and im mutanta.
Classification	GO_accession	Description	Corrected_pValue	Gene_names
Respiratory metabolism	GO:0060003	copper ion export	0.0051882	Gh_D08G1950,Gh_A04G0969,Gh_D12G0446,Gh_A08G2387,Gh_A08G2388,Gh_A12G0443
	GO:0010248	establishment or maintenance of transmembrane electrochemical gradient	0.0052932	Gh_A13G2316,Gh_D13G2472,Gh_A08G0801,Gh_A05G0066,Gh_D06G0487
	GO:0010273	detoxification of copper ion	0.017475	Gh_A08G2387,Gh_A08G2388,Gh_D08G1950
	GO:0045730	respiratory burst	0.021119	Gh_D13G0174,Gh_D11G1577,Gh_A09G0923,Gh_D01G0450,Gh_A04G0959,Gh_D13G0550,Gh_A06G1742,Gh_D12G2133,Gh_D06G2235,Gh_D07G1371,Gh_D05G0424,Gh_D09G0953,Gh_D10G2363,Gh_D04G0893,Gh_A08G0068,Gh_D12G2750,Gh_A07G0017,Gh_A10G2093,Gh_D12G1785,Gh_D08G0109,Gh_D05G0648,Gh_D01G1965,Gh_A08G0581,Gh_A09G2318,Gh_D07G0023,Gh_A12G1642,Gh_A04G0460,Gh_A13G1254,Gh_D08G0676,Gh_D07G0187,Gh_D08G1474,Gh_A07G2307,Gh_A01G1714,Gh_…
	GO:0002679	respiratory burst involved in defense response	0.021119	Gh_D13G0174,Gh_D11G1577,Gh_A09G0923,Gh_D01G0450,Gh_A04G0959,Gh_D13G0550,Gh_A06G1742,Gh_D12G2133,Gh_D06G2235,Gh_D07G1371,Gh_D05G0424,Gh_D09G0953,Gh_D10G2363,Gh_D04G0893,Gh_A08G0068,Gh_D12G2750,Gh_A07G0017,Gh_D12G1785,Gh_A10G2093,Gh_D08G0109,Gh_D05G0648,Gh_D01G1965,Gh_A08G0581,Gh_A09G2318,Gh_D07G0023,Gh_A12G1642,Gh_A04G0460,Gh_A13G1254,Gh_D08G0676,Gh_D07G0187,Gh_D08G1474,Gh_A07G2307,Gh_A01G1714,Gh_…
	GO:0006979	response to oxidative stress	0.022299	Gh_D06G0173,Gh_D11G0139,Gh_A13G1686,Gh_A04G0896,Gh_D02G1928,Gh_D02G2193,Gh_D10G1111,Gh_A11G1091,Gh_D11G1397,Gh_D10G2363,Gh_A10G1317,Gh_A11G0709,Gh_D12G0446,Gh_D11G1212,Gh_D11G0563,Gh_A03G2151,Gh_D05G2338,Gh_D10G0564,Gh_D12G1453,Gh_D01G1177,Gh_A12G1024,Gh_D04G1591,Gh_D05G0626,Gh_A12G2300,Gh_D12G1971,Gh_A05G3601,Gh_A05G0507,Gh_D05G1626,Gh_A03G0619,Gh_A05G3814,Gh_D13G0598,Gh_D05G2072,Gh_D12G1569,Gh_…
Cell wall/Cellulose synthesis	GO:0042546	cell wall biogenesis	1.6787e-28	Gh_D06G2291,Gh_A03G1222,Gh_A10G1553,Gh_A12G2049,Gh_D02G2174,Gh_A10G0934,Gh_A10G1503,Gh_D08G2082,Gh_A08G0474,Gh_A01G1635,Gh_D03G0222,Gh_A05G0369,Gh_D05G0079,Gh_A09G0630,Gh_A08G1080,Gh_A05G1125,Gh_Sca093234G01,Gh_A08G0457,Gh_D04G1897,Gh_D03G0455,Gh_Sca103735G01,Gh_D01G2036,Gh_D05G3894,Gh_D12G0120,Gh_A05G0914,Gh_A06G1599,Gh_A08G1146,Gh_A03G1353,Gh_D05G1805,Gh_A05G3634,Gh_D10G1505,Gh_D10G0059,Gh_A10G…
	GO:0071554	cell wall organization or biogenesis	1.6787e-28	Gh_A08G2296,Gh_D02G1631,Gh_A13G1919,Gh_A02G0055,Gh_A03G0166,Gh_D11G2876,Gh_A07G1871,Gh_A05G0367,Gh_A05G1741,Gh_D11G2786,Gh_D10G1145,Gh_A01G0415,Gh_A08G0306,Gh_D08G2355,Gh_D03G0789,Gh_D11G1279,Gh_A05G1740,Gh_A07G2174,Gh_A11G0392,Gh_D05G0189,Gh_A01G1439,Gh_D13G0255,Gh_A03G0331,Gh_A11G1030,Gh_D10G1593,Gh_D03G1302,Gh_D01G1827,Gh_D01G0420,Gh_D10G1769,Gh_A06G1783,Gh_A11G0434,Gh_D08G1266,Gh_D04G1278,Gh_…
	GO:0009832	plant-type cell wall biogenesis	1.3359e-27	Gh_A11G2936,Gh_D06G2122,Gh_D02G0864,Gh_A11G2856,Gh_A05G1263,Gh_Sca005023G04,Gh_D07G0380,Gh_A05G0140,Gh_D02G1793,Gh_D02G1656,Gh_A09G0065,Gh_A10G1075,Gh_A07G1847,Gh_Sca077568G01,Gh_A07G1710,Gh_D05G3251,Gh_A03G2165,Gh_A06G1836,Gh_A05G1599,Gh_D12G1919,Gh_D05G0998,Gh_A06G1849,Gh_D13G2307,Gh_D04G1243,Gh_A03G0465,Gh_A11G1469,Gh_D11G2698,Gh_A10G0734,Gh_D05G1811,Gh_D05G0484,Gh_D10G0271,Gh_D03G0919,Gh_A13G…
	GO:0071669	plant-type cell wall organization or biogenesis	1.1107e-25	Gh_D01G1673,Gh_A07G1871,Gh_D09G1753,Gh_A05G0808,Gh_A05G1741,Gh_Sca091430G01,Gh_D10G1145,Gh_D06G1953,Gh_D12G0344,Gh_D08G2355,Gh_D03G0789,Gh_A10G2217,Gh_A12G2250,Gh_D05G0189,Gh_A07G0364,Gh_A07G2174,Gh_A05G1740,Gh_A11G0392,Gh_D13G0255,Gh_A02G1492,Gh_A03G0331,Gh_A01G1439,Gh_D07G2083,Gh_A03G0793,Gh_D05G0154,Gh_D05G1510,Gh_A08G2296,Gh_A07G1625,Gh_A13G1919,Gh_A09G1454,Gh_A03G1380,Gh_A02G0055,Gh_A05G1621…
	GO:0009834	secondary cell wall biogenesis	2.7432e-23	Gh_A11G1469,Gh_D05G1805,Gh_A10G0734,Gh_A13G1873,Gh_D03G0919,Gh_D05G1935,Gh_A03G1353,Gh_A11G2895,Gh_A08G0993,Gh_A12G1285,Gh_D10G0550,Gh_A08G1599,Gh_D12G0677,Gh_D05G1431,Gh_A11G2936,Gh_D02G0864,Gh_D06G2122,Gh_A08G0474,Gh_A05G1263,Gh_D02G1793,Gh_D07G0380,Gh_A12G2049,Gh_A10G1553,Gh_Sca103735G01,Gh_D12G1919,Gh_Sca093234G01,Gh_A06G1836,Gh_A06G1849,Gh_D13G2307,Gh_D05G0079,Gh_D04G1243,Gh_A11G0434,Gh_D08G…
	GO:0010383	cell wall polysaccharide metabolic process	8.5116e-20	Gh_A06G0284,Gh_A03G2005,Gh_A03G0631,Gh_A01G1163,Gh_A12G0675,Gh_A10G1026,Gh_D11G3322,Gh_A11G0519,Gh_A06G0540,Gh_D03G0590,Gh_D06G0142,Gh_A08G0421,Gh_A11G0965,Gh_A09G1418,Gh_A10G1518,Gh_D08G0509,Gh_A11G1800,Gh_A04G0239,Gh_A13G2180,Gh_D11G1626,Gh_D11G0603,Gh_D05G1508,Gh_A09G0889,Gh_D05G2420,Gh_A07G0982,Gh_A06G0019,Gh_A02G1486,Gh_Sca063168G01,Gh_D13G0974,Gh_A11G2238,Gh_D07G0060,Gh_A05G1577,Gh_D05G1755…
	GO:0005976	polysaccharide metabolic process	4.2593e-19	Gh_D11G2416,Gh_D08G2082,Gh_A03G1286,Gh_D11G0139,Gh_A11G0308,Gh_A10G0934,Gh_D13G2360,Gh_A03G1222,Gh_D10G1111,Gh_A10G0594,Gh_D06G1599,Gh_A07G0050,Gh_A01G0708,Gh_A12G0322,Gh_A03G2151,Gh_A10G0327,Gh_D02G1726,Gh_A01G1635,Gh_D10G1505,Gh_A12G2374,Gh_D05G1805,Gh_A03G1353,Gh_A05G0914,Gh_A06G0403,Gh_D09G2006,Gh_A10G0735,Gh_A09G1448,Gh_D05G1970,Gh_D05G1431,Gh_D13G1495,Gh_D08G1361,Gh_D02G0535,Gh_D05G1510,Gh_…
	GO:0044036	cell wall macromolecule metabolic process	7.9312e-19	Gh_A01G1948,Gh_D01G1291,Gh_A11G2027,Gh_D07G0107,Gh_A07G0982,Gh_A06G0019,Gh_A02G1486,Gh_A09G0889,Gh_D05G2420,Gh_D07G0060,Gh_A05G1577,Gh_D05G1755,Gh_D12G0542,Gh_D02G1682,Gh_Sca063168G01,Gh_A11G2238,Gh_D13G0974,Gh_D09G2016,Gh_A10G1518,Gh_D08G0509,Gh_A11G0965,Gh_A09G1418,Gh_A05G1141,Gh_D11G0603,Gh_D05G1508,Gh_A04G0239,Gh_A11G1800,Gh_A13G2180,Gh_D11G1626,Gh_A03G0265,Gh_A03G0631,Gh_A01G1163,Gh_A12G0675…
	GO:0070592	cell wall polysaccharide biosynthetic process	1.1078e-15	Gh_D05G0998,Gh_D12G1919,Gh_A04G0787,Gh_A08G1080,Gh_A09G0630,Gh_A03G0465,Gh_D05G0079,Gh_D04G1243,Gh_A06G1849,Gh_A01G1635,Gh_A08G0474,Gh_A05G1263,Gh_D08G2082,Gh_D06G2122,Gh_D09G0628,Gh_D02G0864,Gh_A11G2936,Gh_A12G2049,Gh_A05G1858,Gh_A03G1222,Gh_D02G1656,Gh_D02G1793,Gh_D07G0380,Gh_A08G1599,Gh_D05G2057,Gh_A12G1076,Gh_A12G1285,Gh_D12G0677,Gh_D13G1495,Gh_D08G1361,Gh_D05G1431,Gh_D05G2141,Gh_D10G0271,Gh_…
	GO:0005975	carbohydrate metabolic process	2.0494e-15	Gh_D05G1811,Gh_A02G0276,Gh_D10G0773,Gh_D05G1320,Gh_A06G1865,Gh_A12G2265,Gh_D05G1935,Gh_A07G1077,Gh_A09G1010,Gh_D03G0919,Gh_D08G0801,Gh_D07G1403,Gh_A13G1873,Gh_D11G1378,Gh_D05G3593,Gh_D02G1960,Gh_D09G0181,Gh_A11G1509,Gh_D01G1541,Gh_A13G0170,Gh_D07G1895,Gh_A05G1263,Gh_A11G0640,Gh_D13G0639,Gh_A11G2936,Gh_D06G0652,Gh_D13G1505,Gh_A07G2085,Gh_A12G2578,Gh_A09G1159,Gh_A04G1402,Gh_A05G1339,Gh_D13G1475,Gh_…
	GO:0044038	cell wall macromolecule biosynthetic process	2.0494e-15	Gh_D08G0509,Gh_D11G1279,Gh_A10G1518,Gh_D07G2083,Gh_A05G1740,Gh_A11G0965,Gh_A09G1418,Gh_D11G0603,Gh_A07G1871,Gh_A01G0494,Gh_A08G0306,Gh_A01G0415,Gh_D11G1626,Gh_A04G0239,Gh_D11G2786,Gh_A11G1800,Gh_A13G2180,Gh_A11G1127,Gh_A12G0675,Gh_A03G0631,Gh_A01G1163,Gh_D08G1527,Gh_A06G0284,Gh_A03G2005,Gh_D02G1631,Gh_A08G0421,Gh_D06G0142,Gh_D03G0590,Gh_A11G0519,Gh_D11G3322,Gh_A10G1026,Gh_D06G0296,Gh_A09G1284,Gh_…
	GO:0000271	polysaccharide biosynthetic process	3.9082e-14	Gh_D08G0956,Gh_D11G0582,Gh_D06G0296,Gh_A10G1235,Gh_A11G2932,Gh_A04G1161,Gh_A02G1417,Gh_A09G1284,Gh_A02G1345,Gh_D09G1426,Gh_A11G0073,Gh_D05G1785,Gh_A10G0567,Gh_D12G1407,Gh_A01G0568,Gh_D01G1270,Gh_D01G0510,Gh_A03G0147,Gh_A05G1455,Gh_A11G3137,Gh_D10G1769,Gh_D03G0881,Gh_A06G1783,Gh_D07G1530,Gh_A11G0434,Gh_D11G1962,Gh_D04G1278,Gh_D11G2117,Gh_D10G1593,Gh_D11G0917,Gh_D03G0480,Gh_D09G1855,Gh_A11G2383,Gh_…
	GO:0016051	carbohydrate biosynthetic process	9.8421e-13	Gh_A07G1448,Gh_A05G1577,Gh_D13G0202,Gh_D10G0607,Gh_A11G2238,Gh_D02G2146,Gh_D04G0487,Gh_A01G1475,Gh_A09G1716,Gh_A02G1486,Gh_A11G2790,Gh_A06G0019,Gh_A07G0982,Gh_A12G1130,Gh_A09G0342,Gh_D13G1544,Gh_D01G0345,Gh_A07G1838,Gh_D04G1899,Gh_Sca105728G01,Gh_A08G0421,Gh_D03G0590,Gh_D06G0142,Gh_D01G0911,Gh_D11G3322,Gh_A10G1026,Gh_D09G2057,Gh_D11G2087,Gh_D01G0573,Gh_A12G0675,Gh_D07G1740,Gh_A07G1878,Gh_A06G0284…
	GO:0044264	cellular polysaccharide metabolic process	3.2938e-12	Gh_A03G0420,Gh_A01G1948,Gh_D05G0531,Gh_D07G1157,Gh_A08G1784,Gh_A07G1418,Gh_D08G1167,Gh_A13G0531,Gh_D01G1291,Gh_D10G1867,Gh_A09G0889,Gh_A06G2002,Gh_D13G0974,Gh_Sca063168G01,Gh_D12G0542,Gh_D05G1755,Gh_Sca202550G01,Gh_D07G0060,Gh_A09G1418,Gh_D05G3030,Gh_A10G1518,Gh_D11G1626,Gh_D02G1694,Gh_A11G1800,Gh_A03G2005,Gh_D07G2303,Gh_A12G1931,Gh_A08G0195,Gh_A01G1163,Gh_A03G0631,Gh_A11G0519,Gh_A05G3730,Gh_A06G…
	GO:0071555	cell wall organization	1.5673e-11	Gh_A05G1594,Gh_D09G1949,Gh_A01G0658,Gh_A05G0274,Gh_D11G0455,Gh_D04G1670,Gh_A05G1180,Gh_D01G1313,Gh_A04G1065,Gh_A01G0618,Gh_D10G1437,Gh_D08G0544,Gh_A12G0910,Gh_D10G1749,Gh_D11G1187,Gh_A08G1599,Gh_D03G0919,Gh_D05G1966,Gh_A12G2265,Gh_D06G0604,Gh_A09G1399,Gh_A11G1469,Gh_D12G1393,Gh_A03G0347,Gh_D05G1811,Gh_A12G1619,Gh_D07G1517,Gh_A08G0432,Gh_D07G1369,Gh_A13G0672,Gh_A07G0152,Gh_A03G0465,Gh_D07G0145,Gh_…
	GO:0009664	plant-type cell wall organization	7.8629e-11	Gh_D11G0869,Gh_D11G1422,Gh_D01G1218,Gh_D11G1626,Gh_D07G0974,Gh_D05G3049,Gh_A13G2180,Gh_A05G3670,Gh_A12G2251,Gh_A09G1571,Gh_A06G0284,Gh_D07G2303,Gh_D10G1114,Gh_A03G0620,Gh_A02G0513,Gh_A11G0248,Gh_A03G0631,Gh_A07G0902,Gh_D05G0203,Gh_D04G1924,Gh_A06G0540,Gh_A11G2917,Gh_A06G1840,Gh_D01G1049,Gh_A07G1838,Gh_A02G1613,Gh_D11G0752,Gh_D13G2390,Gh_D05G0945,Gh_D10G1867,Gh_D05G2420,Gh_A03G0343,Gh_A03G0359,Gh_…
	GO:0033692	cellular polysaccharide biosynthetic process	1.1848e-07	Gh_D08G2082,Gh_D02G1928,Gh_A08G0474,Gh_D02G1480,Gh_A12G2049,Gh_D10G1111,Gh_A03G1222,Gh_A11G0308,Gh_D06G1599,Gh_A10G0594,Gh_A03G2151,Gh_D03G0455,Gh_A09G0630,Gh_A08G1080,Gh_A04G0847,Gh_A10G0327,Gh_D05G0079,Gh_A01G1635,Gh_A12G2374,Gh_D10G1505,Gh_D09G1820,Gh_D10G0333,Gh_A08G1146,Gh_A03G1353,Gh_D09G2006,Gh_A06G0403,Gh_A05G0914,Gh_D13G0598,Gh_D05G3894,Gh_D04G1345,Gh_D13G1495,Gh_D08G1361,Gh_D05G1431,Gh_…
	GO:0030243	cellulose metabolic process	9.6063e-06	Gh_A10G0327,Gh_A04G0847,Gh_D05G0079,Gh_A03G1509,Gh_A05G0369,Gh_D07G1517,Gh_D03G0455,Gh_A12G0322,Gh_A04G0787,Gh_A05G1125,Gh_D07G2348,Gh_A09G0630,Gh_A11G0308,Gh_D10G1111,Gh_D12G2049,Gh_A07G1847,Gh_D03G1433,Gh_D07G0380,Gh_A07G0050,Gh_A11G0640,Gh_D09G0345,Gh_D12G2171,Gh_A05G2165,Gh_D02G1480,Gh_D09G0628,Gh_A08G1710,Gh_A01G0658,Gh_D05G0432,Gh_A07G1545,Gh_D02G1960,Gh_A03G1070,Gh_D05G1970,Gh_D04G1345,Gh_…
	GO:0006073	cellular glucan metabolic process	1.5825e-05	Gh_A03G1243,Gh_A04G0787,Gh_A05G1599,Gh_D12G2112,Gh_D07G1517,Gh_A06G1849,Gh_A02G0669,Gh_D02G0220,Gh_D04G1266,Gh_A03G1509,Gh_D13G0639,Gh_D09G0628,Gh_A05G2165,Gh_A11G2856,Gh_D12G2171,Gh_D09G0345,Gh_A11G0640,Gh_D07G0380,Gh_D03G1433,Gh_D02G1656,Gh_A05G0140,Gh_D12G2049,Gh_A07G1847,Gh_D09G2150,Gh_A01G0775,Gh_A07G2085,Gh_A04G1402,Gh_D02G1960,Gh_D11G1378,Gh_A03G1070,Gh_A07G1545,Gh_A05G2724,Gh_A01G0658,Gh_…
	GO:0044042	glucan metabolic process	1.5825e-05	Gh_D05G0432,Gh_A05G0574,Gh_D02G0535,Gh_A08G1710,Gh_D04G1345,Gh_D05G1970,Gh_A09G1448,Gh_D13G0598,Gh_A06G0403,Gh_D09G2006,Gh_D05G3929,Gh_D10G0333,Gh_D09G1820,Gh_A13G0500,Gh_A03G0097,Gh_A12G2374,Gh_D05G2338,Gh_D05G0079,Gh_A04G0847,Gh_A10G0327,Gh_A05G0369,Gh_A05G1125,Gh_D07G2348,Gh_A09G0630,Gh_A12G0322,Gh_D03G0455,Gh_A03G2151,Gh_A10G0594,Gh_A07G0050,Gh_D06G1599,Gh_A11G0308,Gh_A03G1222,Gh_D10G1111,Gh_…
	GO:0051273	beta-glucan metabolic process	0.00018913	Gh_D11G2409,Gh_A07G1448,Gh_D03G0480,Gh_D09G1855,Gh_D07G0060,Gh_D13G0974,Gh_A09G1716,Gh_A05G0127,Gh_D10G1769,Gh_D04G1278,Gh_D05G2420,Gh_A09G0342,Gh_D07G1157,Gh_A03G0147,Gh_A07G1418,Gh_D05G0531,Gh_D04G1899,Gh_D08G0956,Gh_A02G1345,Gh_A08G0421,Gh_A06G0540,Gh_A08G2296,Gh_D01G0911,Gh_A07G1625,Gh_D09G2057,Gh_A07G1459,Gh_D07G1740,Gh_A03G1492,Gh_A07G1871,Gh_A01G0875,Gh_D05G1460,Gh_D01G1673,Gh_A09G0124,Gh_…
	GO:0010215	cellulose microfibril organization	0.00065284	Gh_A02G0513,Gh_D03G0222,Gh_D01G1049,Gh_A03G0631,Gh_D03G0919,Gh_A02G1492,Gh_D05G1966,Gh_D10G1749,Gh_A08G0474,Gh_A01G0996,Gh_D11G1626,Gh_A10G1503,Gh_A11G1469,Gh_A07G1625
	GO:0071668	plant-type cell wall assembly	0.00065284	Gh_D03G0919,Gh_A02G1492,Gh_D05G1966,Gh_D03G0222,Gh_A02G0513,Gh_D01G1049,Gh_A03G0631,Gh_D11G1626,Gh_A10G1503,Gh_A11G1469,Gh_A07G1625,Gh_A08G0474,Gh_D10G1749,Gh_A01G0996
	GO:0030244	cellulose biosynthetic process	0.00066604	Gh_D07G2083,Gh_D05G0079,Gh_D01G1218,Gh_D08G2355,Gh_A11G2099,Gh_A10G1518,Gh_A04G0847,Gh_A10G0327,Gh_D08G0509,Gh_A03G1509,Gh_D07G1703,Gh_A13G2180,Gh_D12G1142,Gh_D02G1694,Gh_A09G0630,Gh_A05G0327,Gh_D05G1460,Gh_A04G0787,Gh_A09G0124,Gh_A01G0875,Gh_D03G0455,Gh_A03G1492,Gh_A07G1871,Gh_D03G1433,Gh_D12G2049,Gh_D07G0380,Gh_D07G1740,Gh_A07G1459,Gh_A11G0308,Gh_D09G2057,Gh_D10G1111,Gh_D01G0911,Gh_D02G1480,Gh_…
	GO:2000652	regulation of secondary cell wall biogenesis	0.00080957	Gh_A12G2460,Gh_A12G2049,Gh_D08G1266,Gh_A03G0166,Gh_D12G2588,Gh_A03G2005,Gh_A13G1873,Gh_A08G1599,Gh_Sca103735G01,Gh_D11G0013,Gh_D03G1419,Gh_A08G0993,Gh_D12G1407,Gh_A12G1285
	GO:0070726	cell wall assembly	0.00086191	Gh_D01G1049,Gh_D03G0222,Gh_A02G0513,Gh_A03G0631,Gh_A02G1492,Gh_D03G0919,Gh_D05G1966,Gh_D10G1749,Gh_A08G0474,Gh_A01G0996,Gh_A10G1503,Gh_D11G1626,Gh_A07G1625,Gh_A11G1469
	GO:0044550	secondary metabolite biosynthetic process	0.0031146	Gh_A01G1948,Gh_A11G2891,Gh_D04G1335,Gh_D05G2607,Gh_A11G0339,Gh_A04G1207,Gh_A10G1835,Gh_D05G2834,Gh_A04G0836,Gh_A08G0107,Gh_D11G2025,Gh_D03G1419,Gh_D10G2528,Gh_D08G1266,Gh_D06G0087,Gh_D10G1769,Gh_D02G2146,Gh_A10G1846,Gh_A08G1593,Gh_D08G0952,Gh_A01G0864,Gh_A08G0161,Gh_A10G1518,Gh_A13G0518,Gh_D10G1565,Gh_A05G1579,Gh_D10G0641,Gh_A02G0879,Gh_D03G0457,Gh_A02G1320,Gh_D12G0195,Gh_A03G0166,Gh_D09G0262,Gh_…
	GO:0051274	beta-glucan biosynthetic process	0.0067823	Gh_A09G1716,Gh_D10G1769,Gh_D04G1278,Gh_D03G0480,Gh_D09G1820,Gh_D13G0974,Gh_D10G0333,Gh_D05G0531,Gh_A01G0658,Gh_D04G1899,Gh_D08G0956,Gh_A02G1345,Gh_D05G0432,Gh_D02G1960,Gh_A07G1545,Gh_A03G1070,Gh_A09G0342,Gh_A03G0147,Gh_D07G1157,Gh_D04G1345,Gh_D10G1111,Gh_D09G2057,Gh_A11G0308,Gh_A07G1459,Gh_D07G1740,Gh_D07G0380,Gh_D12G2049,Gh_D03G1433,Gh_D09G0345,Gh_A08G0421,Gh_A08G2296,Gh_D09G0628,Gh_D02G1480,Gh_…
	GO:0019748	secondary metabolic process	0.015212	Gh_D01G1313,Gh_A13G1911,Gh_D08G1135,Gh_A08G0993,Gh_A08G0633,Gh_D02G0507,Gh_A07G1607,Gh_A08G0826,Gh_A10G0080,Gh_D03G0203,Gh_D01G1750,Gh_A13G0989,Gh_A10G0456,Gh_D05G1811,Gh_D03G1125,Gh_A05G3064,Gh_D11G2770,Gh_D02G0790,Gh_D04G0580,Gh_A10G1891,Gh_D11G2716,Gh_D11G0641,Gh_D11G3277,Gh_A02G1510,Gh_D10G1710,Gh_A01G1839,Gh_D04G1243,Gh_D01G2080,Gh_D02G0931,Gh_A03G0465,Gh_D09G0628,Gh_D03G0479,Gh_A11G2936,Gh_…
	GO:0070507	regulation of microtubule cytoskeleton organization	0.021525	Gh_A01G0658,Gh_A08G1710,Gh_D07G1541,Gh_D10G2082,Gh_A10G1817,Gh_D02G1379,Gh_A07G1847,Gh_A07G1448,Gh_A05G2606
	GO:0032886	regulation of microtubule-based process	0.021525	Gh_D02G1379,Gh_A07G1847,Gh_A01G0658,Gh_D10G2082,Gh_A10G1817,Gh_D07G1541,Gh_A08G1710,Gh_A07G1448,Gh_A05G2606
	GO:0007018	microtubule-based movement	0.023948	Gh_D03G0222,Gh_D01G1049,Gh_A05G0163,Gh_D03G0955,Gh_A02G1492,Gh_A03G0303,Gh_A04G0035,Gh_A12G2032,Gh_A03G0132,Gh_A11G0689,Gh_A09G1736,Gh_D05G3887,Gh_D10G1702,Gh_D12G2210,Gh_A04G1341,Gh_D01G0573,Gh_A04G1056,Gh_A05G0850,Gh_A03G0657,Gh_A01G0564,Gh_D10G2082,Gh_A10G1817,Gh_A07G1077,Gh_D05G1966,Gh_A11G2095,Gh_D03G1273,Gh_A11G3138,Gh_D13G2200,Gh_A01G0996
	GO:0031110	regulation of microtubule polymerization or depolymerization	0.035088	Gh_A07G1448,Gh_D02G1379,Gh_A07G1847,Gh_A01G0658,Gh_A10G1817,Gh_D10G2082,Gh_A08G1710,Gh_D07G1541
	GO:0052546	cell wall pectin metabolic process	0.036435	Gh_D09G1753,Gh_D05G1970,Gh_A12G2251,Gh_A12G0322,Gh_D01G1673,Gh_D12G0344,Gh_D07G2348,Gh_D05G0079,Gh_A03G0465,Gh_A12G2250,Gh_D12G0542,Gh_D11G2409,Gh_D07G0060,Gh_A11G0640,Gh_A03G0097,Gh_A06G0540,Gh_A05G2165,Gh_A08G1146,Gh_D06G0604,Gh_A12G2578,Gh_D07G0380,Gh_A06G0284,Gh_A07G0050,Gh_D05G2420
	GO:0006109	regulation of carbohydrate metabolic process	0.037435	Gh_A12G2578,Gh_D13G0833,Gh_D10G1769,Gh_A12G1130,Gh_D13G0598,Gh_D05G0967,Gh_D02G1928,Gh_A13G0710,Gh_D09G0628,Gh_A10G1518,Gh_D09G0865,Gh_D12G1258,Gh_A13G0531,Gh_D11G2025,Gh_A03G2151,Gh_A09G0630
	GO:0006084	acetyl-CoA metabolic process	0.041011	Gh_D08G0544,Gh_A01G1485,Gh_D05G1785,Gh_A09G0022,Gh_D09G2194,Gh_A09G1748,Gh_A06G0351,Gh_D09G1857,Gh_D05G1811,Gh_A11G1380,Gh_A13G1964,Gh_A05G0127,Gh_A07G1077,Gh_D11G0941,Gh_D01G1723,Gh_A07G0648,Gh_A02G0879,Gh_A05G1566,Gh_D10G1780,Gh_A08G0457,Gh_A05G1599,Gh_D05G0189,Gh_A07G2174,Gh_A03G0129,Gh_D05G2425,Gh_D13G0255,Gh_D07G0724,Gh_D05G0203,Gh_A11G0640,Gh_A03G2157,Gh_D08G0591,Gh_D02G1993,Gh_A05G0140,Gh_…
Response to stress and hormone	GO:0009611	response to wounding	7.3562e-14	Gh_A09G0923,Gh_A05G0931,Gh_Sca074481G01,Gh_D10G1565,Gh_A11G0150,Gh_D02G0832,Gh_D05G1342,Gh_D01G0196,Gh_A11G3061,Gh_A02G0879,Gh_D11G0314,Gh_D05G1123,Gh_A11G0835,Gh_D04G0893,Gh_D07G0603,Gh_D08G2387,Gh_D03G0678,Gh_A04G0301,Gh_A12G1044,Gh_A08G1293,Gh_D08G0109,Gh_D12G1785,Gh_D05G2834,Gh_D08G0427,Gh_D05G1015,Gh_D05G2607,Gh_D12G0630,Gh_D11G0164,Gh_D08G1467,Gh_A05G3681,Gh_D13G2490,Gh_D06G0087,Gh_D10G1769…
	GO:1901700	response to oxygen-containing compound	3.9648e-13	Gh_D01G0585,Gh_A09G0558,Gh_Sca007466G01,Gh_A01G0775,Gh_D05G2471,Gh_A04G0148,Gh_D05G1283,Gh_D03G0026,Gh_A04G0729,Gh_A05G0122,Gh_D02G0793,Gh_D01G1965,Gh_D01G1033,Gh_D05G2583,Gh_D04G1266,Gh_A02G0669,Gh_A07G0534,Gh_A13G1008,Gh_A02G1510,Gh_A11G0270,Gh_A07G2111,Gh_A08G1393,Gh_D08G0676,Gh_D10G0081,Gh_D03G1234,Gh_A03G0066,Gh_A10G0644,Gh_D01G1966,Gh_D01G2285,Gh_D08G1686,Gh_A09G1400,Gh_D05G2926,Gh_D01G1031…
	GO:0009719	response to endogenous stimulus	3.3929e-12	Gh_D05G1785,Gh_A12G2380,Gh_D11G0582,Gh_D02G2077,Gh_A07G1752,Gh_D12G2588,Gh_A11G0102,Gh_A03G1760,Gh_A06G1806,Gh_A08G1593,Gh_A07G1254,Gh_D01G0133,Gh_A12G1955,Gh_A12G1947,Gh_D01G0196,Gh_D03G1687,Gh_D11G0314,Gh_D05G3502,Gh_A07G0232,Gh_A01G0842,Gh_D05G1506,Gh_Sca074481G01,Gh_D11G1577,Gh_D08G1586,Gh_D05G2285,Gh_D04G0446,Gh_A03G0129,Gh_A07G0017,Gh_D02G2055,Gh_A11G1721,Gh_D05G3672,Gh_D08G0109,Gh_D10G1306…
	GO:0010200	response to chitin	5.5467e-10	Gh_D05G2583,Gh_D02G0931,Gh_A09G2441,Gh_D12G2002,Gh_D01G0450,Gh_D13G0550,Gh_D07G1371,Gh_D09G1528,Gh_D05G0424,Gh_A08G1619,Gh_D03G1283,Gh_D03G0087,Gh_A08G0068,Gh_D07G2215,Gh_A09G0913,Gh_D05G0354,Gh_A10G2093,Gh_D01G1965,Gh_D13G0147,Gh_D02G2032,Gh_A01G0984,Gh_A09G2087,Gh_D07G0023,Gh_D08G1585,Gh_A12G1642,Gh_A03G1618,Gh_A11G2387,Gh_D03G1591,Gh_D01G0551,Gh_D08G0676,Gh_A03G0066,Gh_D02G0790,Gh_D12G2746,Gh_…
	GO:0009620	response to fungus	7.3012e-08	Gh_A13G0256,Gh_D06G0417,Gh_A11G1091,Gh_D10G1111,Gh_A10G1553,Gh_A07G0050,Gh_D09G0489,Gh_D12G2750,Gh_D02G2193,Gh_A04G0705,Gh_D02G1805,Gh_D05G3567,Gh_A03G2176,Gh_D04G2035,Gh_D08G0946,Gh_A11G1463,Gh_D02G1480,Gh_D02G0989,Gh_A04G0959,Gh_D08G1949,Gh_A07G1255,Gh_A05G3668,Gh_D12G0606,Gh_D11G1212,Gh_D07G1365,Gh_D06G0879,Gh_A03G2119,Gh_A06G1008,Gh_A07G0124,Gh_D13G0393,Gh_D01G2325,Gh_A02G1410,Gh_D03G0256,Gh_…
	GO:0050896	response to stimulus	1.2692e-07	Gh_D03G0006,Gh_D11G0978,Gh_A10G1176,Gh_D12G1081,Gh_A05G3730,Gh_D07G1297,Gh_D02G2362,Gh_A11G2675,Gh_A13G1538,Gh_D13G2058,Gh_D08G1608,Gh_D03G1031,Gh_D05G1151,Gh_D11G0403,Gh_D04G1012,Gh_D03G1348,Gh_A11G0126,Gh_A06G0923,Gh_D07G1894,Gh_A06G0259,Gh_A12G1416,Gh_D07G0549,Gh_D05G1016,Gh_A05G3125,Gh_Sca098530G01,Gh_D09G0258,Gh_D08G1950,Gh_A01G0289,Gh_A03G1139,Gh_A10G1846,Gh_D01G0423,Gh_D01G0090,Gh_A01G0170…
	GO:0010817	regulation of hormone levels	4.8649e-07	Gh_D10G1114,Gh_D03G0261,Gh_D09G2107,Gh_D05G0203,Gh_A11G0804,Gh_A11G0333,Gh_D08G1846,Gh_D11G0869,Gh_D01G0619,Gh_A10G1518,Gh_D07G1541,Gh_A09G1746,Gh_D07G0724,Gh_D05G3049,Gh_D05G0184,Gh_A06G0923,Gh_A09G0124,Gh_D05G2012,Gh_A01G0606,Gh_A13G1964,Gh_D02G0404,Gh_D08G1604,Gh_D07G1737,Gh_D02G2146,Gh_D10G0607,Gh_A10G1611,Gh_D02G0251,Gh_A07G1448,Gh_D05G0339,Gh_A03G1978,Gh_D04G1899,Gh_D12G1982,Gh_A09G1748,Gh_…
	GO:0010033	response to organic substance	4.87e-07	Gh_A12G1376,Gh_A11G3061,Gh_D12G2076,Gh_D05G3262,Gh_D06G1953,Gh_A08G2199,Gh_D09G0858,Gh_D05G2104,Gh_A10G2217,Gh_D02G0832,Gh_A06G1229,Gh_D03G1232,Gh_A06G1664,Gh_D08G1728,Gh_A11G0504,Gh_A03G1097,Gh_A08G0222,Gh_A04G1393,Gh_A11G2202,Gh_A08G0349,Gh_D08G0970,Gh_D08G1527,Gh_D08G1467,Gh_A05G1354,Gh_A10G1284,Gh_A04G0623,Gh_A07G0772,Gh_A01G0650,Gh_A11G2882,Gh_D05G0148,Gh_D12G0630,Gh_D05G2607,Gh_A05G3491,Gh_…
	GO:0006950	response to stress	7.9571e-07	Gh_D04G1591,Gh_D03G1643,Gh_D12G2135,Gh_D05G2338,Gh_D11G0447,Gh_D06G1553,Gh_D05G0706,Gh_A13G1807,Gh_D01G1303,Gh_D09G0953,Gh_D11G1397,Gh_A09G0630,Gh_A02G1466,Gh_A11G1091,Gh_A04G0749,Gh_A04G0705,Gh_D09G1404,Gh_D08G0591,Gh_D07G1679,Gh_A08G0581,Gh_D02G1480,Gh_A09G0208,Gh_A02G0789,Gh_D10G0059,Gh_D05G0432,Gh_D01G1490,Gh_D05G0412,Gh_A10G0984,Gh_A09G1391,Gh_A06G0307,Gh_D07G1392,Gh_A09G1133,Gh_D04G1049,Gh_…
	GO:0009607	response to biotic stimulus	1.0684e-06	Gh_A06G0540,Gh_D05G0648,Gh_A11G2675,Gh_D06G1610,Gh_A10G1176,Gh_D11G0978,Gh_D02G2125,Gh_A01G0377,Gh_D05G2535,Gh_A05G3304,Gh_D13G1857,Gh_A10G1518,Gh_D09G0571,Gh_D07G0568,Gh_D05G1158,Gh_A01G0993,Gh_A08G1120,Gh_A05G3468,Gh_A01G1507,Gh_D07G0060,Gh_D07G0366,Gh_Sca011684G01,Gh_D09G1582,Gh_D02G1447,Gh_D05G3348,Gh_D07G2357,Gh_D09G1130,Gh_A05G0657,Gh_D12G1499,Gh_D05G0945,Gh_D05G1507,Gh_A13G0531,Gh_D09G2294…
	GO:0051707	response to other organism	1.2587e-06	Gh_D05G2391,Gh_D05G2340,Gh_D04G0815,Gh_A01G0812,Gh_D06G0810,Gh_A05G3948,Gh_D04G0513,Gh_A04G0460,Gh_A03G0010,Gh_A08G0426,Gh_D03G1849,Gh_A03G1219,Gh_D08G1747,Gh_D11G3036,Gh_A05G0819,Gh_A12G2714,Gh_A08G0833,Gh_D13G0273,Gh_D02G2146,Gh_D10G0109,Gh_A05G3980,Gh_A10G0314,Gh_A06G1330,Gh_D08G0509,Gh_D08G2241,Gh_D09G1465,Gh_D11G2007,Gh_A06G1910,Gh_A04G0305,Gh_A02G0862,Gh_A02G0294,Gh_D12G2215,Gh_A05G3670,Gh_…
	GO:0042221	response to chemical stimulus	2.6348e-06	Gh_A05G0463,Gh_D07G1365,Gh_D03G1764,Gh_D10G2363,Gh_A02G0044,Gh_D10G2461,Gh_A12G1024,Gh_D08G1949,Gh_D08G0024,Gh_D02G1726,Gh_A06G1742,Gh_D06G2235,Gh_A03G0009,Gh_D01G0830,Gh_A13G0352,Gh_A13G0128,Gh_A07G0075,Gh_D11G0139,Gh_A05G0264,Gh_D10G0035,Gh_A10G1858,Gh_D01G0869,Gh_D09G0489,Gh_D11G2702,Gh_A09G1126,Gh_A03G0310,Gh_D06G0417,Gh_A05G0262,Gh_A13G0256,Gh_D11G1009,Gh_D07G1260,Gh_A03G0656,Gh_D05G1970,Gh_…
	GO:0009725	response to hormone stimulus	7.1045e-06	Gh_D13G1712,Gh_A08G2112,Gh_D10G1600,Gh_A07G0124,Gh_D03G1334,Gh_D03G0048,Gh_A02G1450,Gh_A05G1961,Gh_A03G2119,Gh_A10G1984,Gh_D07G1999,Gh_A02G1563,Gh_A13G1254,Gh_A03G0656,Gh_Sca034072G01,Gh_D03G0254,Gh_A05G3246,Gh_A12G1452,Gh_D04G0366,Gh_D08G2484,Gh_D08G1732,Gh_A10G0052,Gh_D03G0256,Gh_A09G1910,Gh_D03G0161,Gh_A05G0264,Gh_D10G0035,Gh_A10G1858,Gh_A12G0426,Gh_D03G1369,Gh_D05G3567,Gh_D01G0869,Gh_D02G1805…
	GO:0009411	response to UV	1.8712e-05	Gh_A10G0567,Gh_D05G1785,Gh_D11G1775,Gh_D01G0345,Gh_D11G0942,Gh_A11G3137,Gh_A02G1344,Gh_A07G1418,Gh_D11G0582,Gh_A05G3491,Gh_A02G1417,Gh_A03G1978,Gh_A07G1448,Gh_D08G0952,Gh_D11G2117,Gh_D09G1855,Gh_A04G0583,Gh_D10G0607,Gh_D08G1604,Gh_A06G0351,Gh_D05G0654,Gh_D09G0908,Gh_D10G1769,Gh_A13G1964,Gh_D05G3262,Gh_A04G0767,Gh_D04G1038,Gh_A11G3061,Gh_A02G0879,Gh_Sca091430G01,Gh_D05G3049,Gh_D09G0858,Gh_A09G1746…
	GO:0048509	regulation of meristem development	2.6844e-05	Gh_D05G1811,Gh_A13G0500,Gh_D05G1805,Gh_A05G3634,Gh_A08G1146,Gh_A01G0564,Gh_D05G1966,Gh_A12G0411,Gh_A09G0533,Gh_A10G0735,Gh_D10G1437,Gh_D08G0544,Gh_D02G0352,Gh_A07G1607,Gh_A11G0031,Gh_A12G2524,Gh_A05G1594,Gh_D07G1895,Gh_A13G2004,Gh_A13G0267,Gh_A07G1793,Gh_Sca005023G04,Gh_D09G1534,Gh_D11G3416,Gh_D05G2190,Gh_D13G0639,Gh_D09G0628,Gh_A07G2085,Gh_D07G0162,Gh_D13G2360,Gh_Sca077568G01,Gh_A03G1222,Gh_D05G…
	GO:0009914	hormone transport	5.5868e-05	Gh_A05G1621,Gh_D10G1114,Gh_A07G1625,Gh_D05G0203,Gh_A08G0801,Gh_D02G2369,Gh_D05G1510,Gh_A11G0804,Gh_A01G2050,Gh_D08G1846,Gh_D11G0869,Gh_A13G2316,Gh_D06G0487,Gh_A10G1518,Gh_D05G3049,Gh_D07G0761,Gh_A06G0923,Gh_A04G0767,Gh_A09G0124,Gh_D05G3262,Gh_D08G1375,Gh_D10G1769,Gh_A06G0351,Gh_D07G1737,Gh_D10G0607,Gh_A10G1611,Gh_A03G1978,Gh_D04G1899,Gh_D10G1867,Gh_D01G0345,Gh_D11G0942,Gh_D05G3434,Gh_A10G0567,Gh_…
	GO:0033993	response to lipid	8.4327e-05	Gh_A03G1760,Gh_A06G1806,Gh_D11G3268,Gh_D01G0671,Gh_D01G0569,Gh_A09G0542,Gh_D10G1769,Gh_D04G1081,Gh_A08G1294,Gh_A12G1947,Gh_A12G0572,Gh_D08G1467,Gh_A04G0623,Gh_D13G2490,Gh_A12G2380,Gh_D11G0582,Gh_D05G2284,Gh_A11G2882,Gh_A07G1752,Gh_A11G0102,Gh_D12G2588,Gh_D05G1015,Gh_D05G2607,Gh_A09G1865,Gh_D02G2055,Gh_D12G0051,Gh_D06G0645,Gh_A11G0504,Gh_D08G0109,Gh_D12G1785,Gh_A04G1393,Gh_D09G1024,Gh_D04G0893,Gh_…
	GO:1901698	response to nitrogen compound	0.00015143	Gh_A03G2176,Gh_A10G1324,Gh_A08G0581,Gh_D08G0946,Gh_D01G0849,Gh_A05G0262,Gh_D06G0417,Gh_D12G1229,Gh_D08G0447,Gh_A03G1662,Gh_D09G0489,Gh_D11G2702,Gh_A01G1263,Gh_D09G2255,Gh_A11G0089,Gh_A02G0044,Gh_A05G1364,Gh_A03G2042,Gh_A08G1080,Gh_D03G1764,Gh_D10G2363,Gh_A09G0630,Gh_D09G0953,Gh_A13G0352,Gh_A13G0128,Gh_A04G0959,Gh_D02G0989,Gh_D08G2556,Gh_D08G1949,Gh_A06G1742,Gh_D12G2135,Gh_D06G2235,Gh_D12G2133,Gh_…
	GO:0009693	ethylene biosynthetic process	0.00015143	Gh_D11G2527,Gh_D12G1982,Gh_D05G2018,Gh_D05G1507,Gh_A06G2028,Gh_A09G1391,Gh_D12G1407,Gh_D07G1349,Gh_D07G0599,Gh_D04G0302,Gh_A05G3681,Gh_A12G1285,Gh_A07G0774,Gh_D07G0107,Gh_A05G1821,Gh_A05G1492,Gh_A08G0460,Gh_D12G2746,Gh_A12G1811,Gh_D12G0773,Gh_A08G0833,Gh_A05G3980,Gh_D13G0174,Gh_A09G0923,Gh_D05G1663,Gh_A06G1742,Gh_A06G1341,Gh_D06G2235,Gh_A07G0773,Gh_D08G0546,Gh_D05G2535,Gh_D05G1508,Gh_D03G1348,Gh_…
	GO:0009692	ethylene metabolic process	0.00015143	Gh_A08G1100,Gh_A05G1339,Gh_A03G1385,Gh_D03G0678,Gh_A08G0068,Gh_D06G1417,Gh_A07G1240,Gh_A11G2218,Gh_D08G0109,Gh_A12G2673,Gh_A10G2093,Gh_D08G0946,Gh_D02G1805,Gh_A06G1742,Gh_A06G1341,Gh_D06G2235,Gh_D13G0174,Gh_A05G3980,Gh_D05G1663,Gh_A09G0923,Gh_D10G2363,Gh_D09G0953,Gh_D08G0546,Gh_A07G0773,Gh_D05G2535,Gh_D05G1508,Gh_D03G1348,Gh_D12G2746,Gh_A12G1811,Gh_D07G0107,Gh_A05G1821,Gh_A05G1492,Gh_A07G0774,Gh_…
	GO:0097305	response to alcohol	0.00032883	Gh_A13G1254,Gh_A06G0570,Gh_A10G2123,Gh_D04G1345,Gh_D04G1049,Gh_A05G3246,Gh_A12G1452,Gh_D04G0366,Gh_A05G0864,Gh_A11G0362,Gh_A08G0408,Gh_D08G1732,Gh_D10G0059,Gh_D02G1202,Gh_A10G0052,Gh_A12G1091,Gh_A09G1910,Gh_D13G1712,Gh_D05G0478,Gh_A07G0124,Gh_D13G0598,Gh_A05G0577,Gh_A02G1529,Gh_D03G1334,Gh_D12G1569,Gh_D03G0048,Gh_A02G1450,Gh_A10G1984,Gh_A06G1599,Gh_A09G0630,Gh_D09G0953,Gh_D05G0706,Gh_A03G2151,Gh_…
	GO:0006952	defense response	0.00076623	Gh_D08G1688,Gh_A06G1172,Gh_D08G1145,Gh_A05G0451,Gh_A12G0211,Gh_A07G0932,Gh_D09G2294,Gh_A13G0531,Gh_D05G1507,Gh_D13G0441,Gh_D02G1447,Gh_D05G3348,Gh_D07G2357,Gh_D02G0404,Gh_A05G3125,Gh_D12G1499,Gh_D09G0258,Gh_A05G0657,Gh_D09G1130,Gh_Sca011684G01,Gh_A05G3468,Gh_A01G1507,Gh_D07G0366,Gh_D13G2427,Gh_D09G2016,Gh_D05G1158,Gh_A01G0993,Gh_A10G1518,Gh_D09G0571,Gh_A08G1120,Gh_D04G1012,Gh_D02G2125,Gh_A10G1345…
	GO:0009737	response to abscisic acid stimulus	0.00087932	Gh_D03G0048,Gh_D12G1569,Gh_A06G1599,Gh_A10G1984,Gh_D13G0598,Gh_A07G0124,Gh_D03G1334,Gh_A02G1529,Gh_A05G0577,Gh_D13G1712,Gh_A09G1910,Gh_A10G0052,Gh_D10G0059,Gh_A12G1091,Gh_D02G1202,Gh_D08G1732,Gh_A11G0362,Gh_D04G1345,Gh_D04G1049,Gh_A10G2123,Gh_A06G0570,Gh_A13G1254,Gh_D04G0366,Gh_A05G0864,Gh_A12G1452,Gh_A05G3246,Gh_D06G0417,Gh_A05G2356,Gh_A11G1091,Gh_D12G2750,Gh_A03G0236,Gh_D02G2193,Gh_D05G3567,Gh_…
	GO:0050832	defense response to fungus	0.0011224	Gh_D08G1527,Gh_D02G1877,Gh_D11G0978,Gh_A07G0742,Gh_D04G0893,Gh_D09G2057,Gh_A11G0835,Gh_A04G0160,Gh_A11G2675,Gh_D12G1785,Gh_D07G1812,Gh_D06G0645,Gh_D03G1204,Gh_A08G0421,Gh_A06G1664,Gh_D09G1465,Gh_D07G2083,Gh_D11G1577,Gh_A05G3980,Gh_D08G0509,Gh_A01G0993,Gh_A10G0314,Gh_D11G2786,Gh_A08G2389,Gh_D11G0314,Gh_A07G1871,Gh_A05G0367,Gh_A12G1947,Gh_A05G0657,Gh_A07G2307,Gh_D06G0087,Gh_D09G2465,Gh_D07G0187,Gh_…
	GO:0009414	response to water deprivation	0.0019857	Gh_D12G0315,Gh_A13G0267,Gh_A04G0729,Gh_D07G2215,Gh_D09G0628,Gh_A05G0066,Gh_D01G1965,Gh_D05G2929,Gh_D02G0793,Gh_D05G2629,Gh_D06G0579,Gh_D07G1371,Gh_A02G1510,Gh_D12G0092,Gh_A02G0783,Gh_D11G0941,Gh_D03G0831,Gh_D01G0450,Gh_D12G2002,Gh_A05G3620,Gh_A01G1714,Gh_D03G0203,Gh_A13G1399,Gh_D03G1234,Gh_A03G0935,Gh_D02G0790,Gh_D05G2245,Gh_D12G1318,Gh_A01G0984,Gh_D11G1131,Gh_A08G0011,Gh_A07G0022,Gh_A08G2531,Gh_…
	GO:0034285	response to disaccharide stimulus	0.0029627	Gh_A11G2218,Gh_D08G1998,Gh_Sca007466G01,Gh_A01G0775,Gh_A11G1616,Gh_D09G0861,Gh_A10G1937,Gh_A13G0267,Gh_A03G1286,Gh_D02G1726,Gh_D02G1670,Gh_D13G1475,Gh_D05G3193,Gh_D07G0969,Gh_A09G2475,Gh_A06G0454,Gh_D04G1926,Gh_A08G0792,Gh_D03G1617,Gh_A06G0744,Gh_A02G1529,Gh_A06G1944,Gh_D05G2926,Gh_Sca004949G01,Gh_D01G0424,Gh_A08G1614,Gh_A08G0826,Gh_D11G2527,Gh_D12G0463,Gh_D02G0863,Gh_D12G1258,Gh_D02G0311,Gh_D13G…
	GO:0009744	response to sucrose stimulus	0.0029627	Gh_A11G2218,Gh_Sca007466G01,Gh_D09G0861,Gh_A01G0775,Gh_D08G1998,Gh_A11G1616,Gh_A03G1286,Gh_A13G0267,Gh_A10G1937,Gh_D02G1726,Gh_D05G3193,Gh_D07G0969,Gh_D13G1475,Gh_D02G1670,Gh_D03G1617,Gh_A06G0744,Gh_A02G1529,Gh_A09G2475,Gh_A06G0454,Gh_D04G1926,Gh_A08G0792,Gh_D01G0424,Gh_Sca004949G01,Gh_A08G0826,Gh_A08G1614,Gh_D05G2926,Gh_A06G1944,Gh_D12G1258,Gh_D02G0311,Gh_D02G0863,Gh_D11G2527,Gh_D12G0463,Gh_A05G…
	GO:0009415	response to water stimulus	0.00399	Gh_D06G0414,Gh_A10G2222,Gh_A08G0233,Gh_D05G2674,Gh_D11G0978,Gh_A06G1910,Gh_A09G1571,Gh_D11G3324,Gh_D01G1400,Gh_D09G0571,Gh_A10G1518,Gh_A01G0993,Gh_D08G0048,Gh_A07G0437,Gh_D08G1608,Gh_A08G2548,Gh_A03G2136,Gh_D11G0772,Gh_A12G2411,Gh_D05G2784,Gh_D10G2121,Gh_D02G2146,Gh_D10G0307,Gh_D06G1551,Gh_D12G1499,Gh_D05G1507,Gh_A02G0710,Gh_A05G3948,Gh_A02G0365,Gh_A10G0827,Gh_A01G0651,Gh_A04G0460,Gh_D04G1200,Gh_…
	GO:0006970	response to osmotic stress	0.0044331	Gh_D04G1461,Gh_A09G2216,Gh_A05G0127,Gh_D10G1769,Gh_A09G0542,Gh_A01G0120,Gh_A01G0882,Gh_D11G3268,Gh_D06G1036,Gh_A03G1760,Gh_D05G0543,Gh_A08G0477,Gh_Sca005103G03,Gh_D05G2607,Gh_A09G1570,Gh_D09G2209,Gh_A07G0187,Gh_D13G2478,Gh_D05G2284,Gh_A11G2882,Gh_D01G2179,Gh_D13G2490,Gh_A10G0613,Gh_A10G1284,Gh_D09G2147,Gh_A02G0806,Gh_D08G1467,Gh_D06G0409,Gh_A05G1621,Gh_D07G0603,Gh_A09G1854,Gh_D04G0893,Gh_A04G1393…
	GO:0009750	response to fructose stimulus	0.0051085	Gh_D01G0424,Gh_Sca004949G01,Gh_D05G1805,Gh_A08G1614,Gh_A04G0265,Gh_Sca202550G01,Gh_A05G3601,Gh_A06G1944,Gh_A13G0120,Gh_A06G0744,Gh_D01G0474,Gh_D05G1626,Gh_A02G1529,Gh_D02G0404,Gh_D10G1769,Gh_A09G2475,Gh_A08G0792,Gh_A12G2265,Gh_D08G1096,Gh_D06G1113,Gh_D09G2147,Gh_D05G3434,Gh_D13G2340,Gh_A08G0477,Gh_D02G0311,Gh_D06G0864,Gh_A02G0814,Gh_D02G0863,Gh_D12G0463,Gh_D11G2527,Gh_A13G1686,Gh_A07G1625,Gh_D11G…
	GO:0009651	response to salt stress	0.0052161	Gh_A12G2265,Gh_A09G1399,Gh_A12G0443,Gh_A07G1077,Gh_A09G1010,Gh_A03G0935,Gh_D02G0790,Gh_A10G0322,Gh_A11G1380,Gh_A04G0265,Gh_A02G0276,Gh_A11G2875,Gh_A11G2719,Gh_D03G0203,Gh_D11G1131,Gh_A01G0984,Gh_A07G1607,Gh_A07G2285,Gh_A07G0022,Gh_D02G0311,Gh_D05G2245,Gh_D08G1096,Gh_A10G0220,Gh_A07G1450,Gh_A03G0500,Gh_A04G1402,Gh_D01G0330,Gh_A04G0729,Gh_D12G0315,Gh_A10G0810,Gh_D11G3073,Gh_D09G1036,Gh_D09G1534,Gh_…
	GO:0034284	response to monosaccharide stimulus	0.0052768	Gh_D06G1610,Gh_A11G2218,Gh_A01G0775,Gh_D09G0861,Gh_A05G1621,Gh_D08G0970,Gh_D13G0205,Gh_A13G0267,Gh_A10G1937,Gh_A13G1686,Gh_A07G1625,Gh_D11G0139,Gh_A02G0242,Gh_D09G0628,Gh_A10G1518,Gh_A09G0840,Gh_A11G1611,Gh_A02G0669,Gh_D03G1232,Gh_D03G1687,Gh_A04G1399,Gh_A06G1836,Gh_D13G1475,Gh_A08G0896,Gh_D02G1670,Gh_A09G0630,Gh_D07G0969,Gh_D10G1769,Gh_D02G0404,Gh_A09G2475,Gh_A08G0792,Gh_A12G2265,Gh_A13G0120,Gh_…
	GO:0009723	response to ethylene stimulus	0.0065283	Gh_A05G0085,Gh_D04G0893,Gh_D11G1978,Gh_D03G0678,Gh_D02G2055,Gh_A06G1664,Gh_A12G2673,Gh_D08G0109,Gh_D06G0645,Gh_D05G3672,Gh_A01G2016,Gh_A07G0714,Gh_A03G1639,Gh_A09G0923,Gh_A11G0965,Gh_A06G1229,Gh_A04G0305,Gh_A04G0767,Gh_A07G1599,Gh_A12G1376,Gh_D05G1342,Gh_A11G2273,Gh_D06G1953,Gh_D11G0314,Gh_D05G1016,Gh_D01G0133,Gh_D08G1170,Gh_D05G3348,Gh_D06G1551,Gh_D12G1499,Gh_A03G2136,Gh_A03G1760,Gh_D05G2784,Gh_…
	GO:0009746	response to hexose stimulus	0.007991	Gh_A05G1529,Gh_D02G0863,Gh_D12G0463,Gh_D11G2527,Gh_D06G0864,Gh_A02G0814,Gh_D02G0311,Gh_A08G0477,Gh_D13G2340,Gh_D05G3434,Gh_D06G1113,Gh_D09G2147,Gh_D08G1096,Gh_A08G0792,Gh_A12G2265,Gh_D10G1769,Gh_D02G0404,Gh_A09G2475,Gh_A02G1529,Gh_D05G1626,Gh_A06G0744,Gh_A13G0120,Gh_D01G0474,Gh_A04G0265,Gh_Sca202550G01,Gh_A06G1944,Gh_A05G3601,Gh_D05G1805,Gh_A08G1614,Gh_D01G0424,Gh_Sca004949G01,Gh_A09G0840,Gh_A10G…
	GO:0042742	defense response to bacterium	0.0084577	Gh_D02G1805,Gh_D02G1928,Gh_D09G1404,Gh_A13G0267,Gh_A03G1286,Gh_D01G1965,Gh_D09G0628,Gh_A01G0775,Gh_D07G0162,Gh_D03G1283,Gh_A09G1825,Gh_A08G0068,Gh_D11G2702,Gh_D09G0489,Gh_A04G0705,Gh_D01G0839,Gh_D06G1553,Gh_A03G2151,Gh_A09G0371,Gh_D11G1312,Gh_D05G0424,Gh_D06G0879,Gh_D09G0953,Gh_A09G0630,Gh_D07G0969,Gh_D02G0931,Gh_D01G0450,Gh_A04G0959,Gh_D02G1726,Gh_D13G0550,Gh_A05G3949,Gh_D09G0393,Gh_A09G1400,Gh_…
	GO:0010104	regulation of ethylene mediated signaling pathway	0.011073	Gh_D13G1966,Gh_D05G3348,Gh_D01G0450,Gh_D01G0133,Gh_A01G2016,Gh_A08G2220,Gh_A13G1607,Gh_A11G2273,Gh_A13G1254,Gh_D12G1291,Gh_A04G0305
	GO:0009753	response to jasmonic acid stimulus	0.012039	Gh_A05G2088,Gh_D05G2340,Gh_D12G0630,Gh_D05G0339,Gh_D05G2607,Gh_D05G1507,Gh_D08G1467,Gh_D06G0810,Gh_A05G3948,Gh_A06G1923,Gh_D11G0164,Gh_A02G0365,Gh_D08G2141,Gh_A10G1284,Gh_A03G0010,Gh_A04G0460,Gh_D13G2490,Gh_D05G3842,Gh_A05G3681,Gh_D07G0187,Gh_D03G1849,Gh_D05G1016,Gh_D06G0087,Gh_D07G0549,Gh_D05G3348,Gh_D06G1551,Gh_D07G1429,Gh_A12G1947,Gh_A07G2307,Gh_D04G1461,Gh_D11G3036,Gh_A05G3468,Gh_A08G1593,Gh_…
	GO:0009617	response to bacterium	0.013633	Gh_A04G0666,Gh_D02G0338,Gh_A08G0421,Gh_D05G0648,Gh_D13G1162,Gh_D08G0509,Gh_D07G0568,Gh_A10G1518,Gh_A08G1120,Gh_D11G2007,Gh_D08G2241,Gh_A04G0305,Gh_D13G1857,Gh_D12G2215,Gh_A05G3304,Gh_D05G3348,Gh_D09G1582,Gh_A03G1219,Gh_D12G1499,Gh_D09G1130,Gh_A05G0819,Gh_A05G3468,Gh_A01G1507,Gh_D08G1747,Gh_D07G0366,Gh_D05G2391,Gh_A01G0812,Gh_A03G0420,Gh_A07G0498,Gh_A13G0531,Gh_D04G0513,Gh_D06G0810,Gh_D05G1507,Gh_…
	GO:0009628	response to abiotic stimulus	0.019146	Gh_D05G2607,Gh_Sca005103G03,Gh_A09G0006,Gh_A05G3491,Gh_D09G2209,Gh_A11G2882,Gh_D07G1724,Gh_A10G1284,Gh_A04G0623,Gh_D08G1467,Gh_A07G2307,Gh_D08G1375,Gh_A11G1156,Gh_A09G2216,Gh_D07G0187,Gh_A10G0910,Gh_A09G0542,Gh_D13G1849,Gh_D05G2913,Gh_A08G1234,Gh_A01G0882,Gh_D03G0480,Gh_D05G0543,Gh_D02G0832,Gh_A06G1229,Gh_A08G2199,Gh_D09G0865,Gh_D04G1202,Gh_D09G0858,Gh_Sca091430G01,Gh_A05G0327,Gh_A05G3173,Gh_A12G…
	GO:0009873	ethylene mediated signaling pathway	0.024709	Gh_D06G2235,Gh_A12G1091,Gh_A06G1742,Gh_D13G1966,Gh_A09G0923,Gh_D01G0450,Gh_D09G0953,Gh_A12G1452,Gh_D08G2141,Gh_A11G2273,Gh_A13G1254,Gh_D12G0446,Gh_A12G1376,Gh_D12G1291,Gh_A04G0305,Gh_A08G0068,Gh_D12G2750,Gh_D12G1499,Gh_A11G1091,Gh_D05G3348,Gh_D01G0133,Gh_D08G1170,Gh_A09G1399,Gh_A12G0443,Gh_D05G1016,Gh_D12G1569,Gh_A01G2016,Gh_A08G2220,Gh_A13G1607,Gh_D08G0109
	GO:0009605	response to external stimulus	0.02504	Gh_A11G0504,Gh_D08G1728,Gh_D08G0109,Gh_A07G1625,Gh_D12G1785,Gh_A04G0301,Gh_A06G1664,Gh_D02G2369,Gh_D05G1510,Gh_A05G1621,Gh_A02G0055,Gh_A09G1529,Gh_A02G0879,Gh_Sca091430G01,Gh_A11G3061,Gh_A04G0767,Gh_A12G1376,Gh_A05G0327,Gh_A06G1229,Gh_D13G0255,Gh_A03G0129,Gh_A11G2365,Gh_A09G0923,Gh_A01G0900,Gh_D10G1565,Gh_A11G0020,Gh_D13G1849,Gh_D09G1948,Gh_A06G0351,Gh_D02G2177,Gh_D05G0543,Gh_D09G1855,Gh_D11G2117…
	GO:0009409	response to cold	0.02875	Gh_A12G1076,Gh_D09G0181,Gh_D03G1591,Gh_A05G3751,Gh_D02G0311,Gh_A07G2285,Gh_D11G1131,Gh_A01G0984,Gh_D01G1541,Gh_A10G0080,Gh_D08G2394,Gh_D05G2205,Gh_A11G2719,Gh_A09G1400,Gh_A08G0792,Gh_A03G0066,Gh_A09G1010,Gh_A07G1077,Gh_D07G0969,Gh_A02G0783,Gh_D07G1371,Gh_D12G2112,Gh_D01G0450,Gh_D06G0855,Gh_A07G1341,Gh_D09G0628,Gh_D09G1036,Gh_D11G3073,Gh_A04G0729,Gh_D12G0315,Gh_D10G1564,Gh_D03G1283,Gh_A04G0148,Gh_…
	GO:0009646	response to absence of light	0.030314	Gh_D10G2363,Gh_D05G0424,Gh_A11G1969,Gh_D13G2340,Gh_D11G2007,Gh_D13G0174,Gh_A09G0840,Gh_A05G2623,Gh_D05G2913,Gh_D02G1773,Gh_A10G2093,Gh_Sca004949G01,Gh_A11G2719,Gh_D11G3073,Gh_D12G0694,Gh_A12G0689,Gh_A07G2307,Gh_D09G0861,Gh_A09G2475,Gh_D07G0187
	GO:0009266	response to temperature stimulus	0.030314	Gh_Sca005084G02,Gh_D03G1591,Gh_D03G1421,Gh_D02G0311,Gh_A07G2285,Gh_A01G0984,Gh_D11G1131,Gh_A09G1399,Gh_A08G0792,Gh_D07G2116,Gh_D07G0969,Gh_A02G0783,Gh_D12G2112,Gh_D06G0855,Gh_A06G0916,Gh_D01G0450,Gh_A07G1341,Gh_D09G0628,Gh_Sca062517G01,Gh_D09G1036,Gh_D12G0315,Gh_D07G2215,Gh_D03G1283,Gh_A07G1450,Gh_D05G2629,Gh_D06G0579,Gh_D04G1200,Gh_A04G0460,Gh_A10G0827,Gh_A01G0651,Gh_D04G0513,Gh_D03G1655,Gh_D02G…
	GO:0071396	cellular response to lipid	0.035041	Gh_D08G2140,Gh_D05G2284,Gh_D11G0582,Gh_A11G2882,Gh_D03G1655,Gh_D05G1015,Gh_A08G1791,Gh_D05G0339,Gh_A05G3948,Gh_D08G1467,Gh_D05G1507,Gh_A02G0365,Gh_A13G0531,Gh_A07G1569,Gh_D13G2490,Gh_D08G2141,Gh_A04G0460,Gh_D07G0549,Gh_D07G0107,Gh_A05G2244,Gh_D05G1016,Gh_D11G0373,Gh_D05G2857,Gh_A12G1947,Gh_A13G1964,Gh_D06G1551,Gh_D12G1499,Gh_A05G3147,Gh_A08G1294,Gh_D13G0199,Gh_D11G3268,Gh_A03G1760,Gh_D04G0612,Gh_…
	GO:0009694	jasmonic acid metabolic process	0.041011	Gh_D07G1365,Gh_A06G1910,Gh_A11G3061,Gh_A07G1255,Gh_A02G0862,Gh_D05G2535,Gh_A02G0294,Gh_D05G1342,Gh_D02G1726,Gh_A11G0150,Gh_D11G1886,Gh_A08G1120,Gh_D02G0931,Gh_D05G2583,Gh_A06G0677,Gh_D02G0989,Gh_A03G1286,Gh_D12G1785,Gh_A08G1293,Gh_D02G1480,Gh_D02G1805,Gh_A07G0468,Gh_A11G0333,Gh_A01G0957,Gh_D02G2193,Gh_D06G0417,Gh_A03G0010,Gh_A10G1284,Gh_A05G3681,Gh_D05G1507,Gh_A05G3948,Gh_D04G0513,Gh_D11G0164,Gh_…
	GO:0009740	gibberellic acid mediated signaling pathway	0.041623	Gh_A03G0129,Gh_A11G2882,Gh_A01G0842,Gh_D08G1586,Gh_A05G0782,Gh_A07G1569,Gh_D04G1049,Gh_A13G0531,Gh_A03G2151,Gh_D03G0026,Gh_A08G1294,Gh_Sca051315G01,Gh_D05G3907,Gh_A13G1964,Gh_D13G0598,Gh_A03G0620,Gh_D13G2360,Gh_A04G1393,Gh_A11G1091,Gh_A05G2244,Gh_A07G1077,Gh_D01G0569,Gh_A10G1541,Gh_D01G1031,Gh_D11G3268,Gh_A06G0128,Gh_D02G1928,Gh_D01G0869
Others	GO:0010410	hemicellulose metabolic process	7.9312e-19	Gh_D08G1527,Gh_A03G2005,Gh_A03G0631,Gh_A01G1163,Gh_A12G0675,Gh_A11G1127,Gh_A10G1026,Gh_A11G0519,Gh_D11G3322,Gh_D06G0142,Gh_D03G0590,Gh_A08G0421,Gh_D02G1631,Gh_A11G0965,Gh_A12G2179,Gh_A05G1740,Gh_A09G1418,Gh_D07G2083,Gh_A10G1518,Gh_D08G0509,Gh_D11G1279,Gh_A04G0239,Gh_D11G2786,Gh_A11G1800,Gh_A13G2180,Gh_A01G0494,Gh_A08G0306,Gh_A01G0415,Gh_D11G1626,Gh_A07G1871,Gh_D11G0603,Gh_D05G1508,Gh_A09G0889,Gh_…
	GO:0045491	xylan metabolic process	3.99e-18	Gh_A11G0965,Gh_A12G2179,Gh_A09G1418,Gh_A05G1740,Gh_D07G2083,Gh_A10G1518,Gh_D08G0509,Gh_D11G1279,Gh_A04G0239,Gh_D11G2786,Gh_A11G1800,Gh_A13G2180,Gh_A01G0415,Gh_A08G0306,Gh_A01G0494,Gh_D11G1626,Gh_D11G0603,Gh_A07G1871,Gh_D05G1508,Gh_D08G1527,Gh_A03G2005,Gh_A03G0631,Gh_A01G1163,Gh_A12G0675,Gh_A11G1127,Gh_A10G1026,Gh_A11G0519,Gh_D11G3322,Gh_D03G0590,Gh_D06G0142,Gh_A08G0421,Gh_D02G1631,Gh_A01G1948,Gh_…
	GO:0045492	xylan biosynthetic process	2.0465e-16	Gh_D06G0296,Gh_A04G1161,Gh_A09G1284,Gh_A01G1948,Gh_D01G1291,Gh_D09G1426,Gh_D01G1270,Gh_D01G0510,Gh_D12G1407,Gh_A01G0568,Gh_A06G1783,Gh_A02G1486,Gh_D10G1769,Gh_A06G0019,Gh_A07G0982,Gh_D11G1962,Gh_D04G1278,Gh_A11G0434,Gh_A09G0889,Gh_D06G0226,Gh_D05G1755,Gh_A11G2383,Gh_A05G1577,Gh_A11G2238,Gh_D13G0974,Gh_D01G1827,Gh_Sca063168G01,Gh_D11G1279,Gh_D08G0509,Gh_A10G1518,Gh_D07G2083,Gh_A05G1740,Gh_A11G0965…
	GO:0070589	cellular component macromolecule biosynthetic process	2.0494e-15	Gh_D03G0919,Gh_A05G0914,Gh_D05G3894,Gh_A06G1865,Gh_A08G1146,Gh_A11G2468,Gh_A03G1353,Gh_D05G1935,Gh_A11G1802,Gh_D11G2698,Gh_A11G1469,Gh_A13G0989,Gh_A10G0734,Gh_D10G1505,Gh_D10G0271,Gh_D05G2141,Gh_D13G1495,Gh_D08G1361,Gh_D05G1431,Gh_D12G0677,Gh_A12G1285,Gh_A12G1076,Gh_D05G2057,Gh_A08G1599,Gh_D07G0380,Gh_D02G1793,Gh_D02G1656,Gh_A12G2049,Gh_A03G1222,Gh_A05G1858,Gh_D09G0628,Gh_D06G2122,Gh_D02G0864,Gh_…
	GO:0010413	glucuronoxylan metabolic process	2.3904e-12	Gh_A08G0306,Gh_A01G0415,Gh_D11G1626,Gh_D11G2786,Gh_A13G2180,Gh_A07G1871,Gh_D11G0603,Gh_D07G2083,Gh_A11G0965,Gh_A05G1740,Gh_A09G1418,Gh_D08G0509,Gh_D11G1279,Gh_A10G1518,Gh_A11G0519,Gh_D11G3322,Gh_D02G1631,Gh_A08G0421,Gh_D06G0142,Gh_D03G0590,Gh_D08G1527,Gh_A03G2005,Gh_A11G1127,Gh_A03G0631,Gh_D01G1270,Gh_A01G0568,Gh_D12G1407,Gh_D09G1426,Gh_A09G1284,Gh_A04G1161,Gh_A01G1948,Gh_D06G0296,Gh_D13G0974,Gh_…
	GO:0045229	external encapsulating structure organization	2.2357e-10	Gh_A10G2217,Gh_A12G2250,Gh_A07G2174,Gh_A07G0364,Gh_A11G0392,Gh_A03G0331,Gh_D13G0255,Gh_A01G1439,Gh_A02G1492,Gh_A03G0793,Gh_D03G0789,Gh_D10G1145,Gh_Sca091430G01,Gh_A05G0439,Gh_D12G0344,Gh_D01G1673,Gh_A05G0367,Gh_D11G2876,Gh_A05G0808,Gh_D09G1753,Gh_A05G1741,Gh_A02G0055,Gh_D10G1034,Gh_A09G1454,Gh_A03G1380,Gh_A07G1625,Gh_A11G0504,Gh_D05G1510,Gh_D05G0154,Gh_A05G3823,Gh_D08G2220,Gh_D10G1561,Gh_D11G0582…
	GO:0006334	nucleosome assembly	2.9653e-10	Gh_D05G0853,Gh_D09G0854,Gh_A08G2115,Gh_A08G0649,Gh_A08G2114,Gh_A08G0011,Gh_A07G1271,Gh_D08G2486,Gh_D08G0035,Gh_D12G1517,Gh_A10G0474,Gh_D10G0498,Gh_A08G2531,Gh_D08G2487,Gh_D03G1245,Gh_D13G2254,Gh_A05G0098,Gh_A09G0836,Gh_D05G0161,Gh_D07G2116,Gh_D03G1234,Gh_D08G0751,Gh_D13G2389,Gh_A08G1647,Gh_A07G1900,Gh_A11G1156,Gh_A12G1395,Gh_A13G1990,Gh_A08G2544,Gh_D01G2134,Gh_D09G0853,Gh_D08G0048,Gh_A10G0472,Gh_…
	GO:0034728	nucleosome organization	2.9653e-10	Gh_D07G2116,Gh_D03G1234,Gh_D05G0161,Gh_A08G1647,Gh_D13G2389,Gh_D08G0751,Gh_A07G1900,Gh_A11G1156,Gh_A12G1395,Gh_A13G1990,Gh_A08G2544,Gh_D09G0853,Gh_D01G2134,Gh_A08G0649,Gh_A08G0011,Gh_A08G2114,Gh_A08G2115,Gh_D09G0854,Gh_D05G0853,Gh_D12G1517,Gh_D08G0035,Gh_A07G1271,Gh_D08G2486,Gh_D10G0498,Gh_A08G2531,Gh_A10G0474,Gh_D08G2487,Gh_D03G1245,Gh_D13G2254,Gh_A05G0098,Gh_A09G0836,Gh_A08G2543,Gh_A03G0310,Gh_…
	GO:0010243	response to organonitrogen compound	8.9295e-10	Gh_A08G1191,Gh_D08G1932,Gh_A05G0528,Gh_D07G0866,Gh_A07G0378,Gh_D07G1289,Gh_A07G0124,Gh_A06G1008,Gh_D10G0117,Gh_A03G2119,Gh_D03G0254,Gh_A02G1457,Gh_A05G0864,Gh_A13G1254,Gh_A02G1713,Gh_D05G0412,Gh_D02G0535,Gh_D03G0256,Gh_A08G0581,Gh_D08G0946,Gh_D01G0849,Gh_A03G2176,Gh_A10G1324,Gh_D11G2702,Gh_D09G0489,Gh_A01G1263,Gh_A03G1662,Gh_D08G0447,Gh_D12G1229,Gh_D06G0417,Gh_A05G0262,Gh_D10G2363,Gh_D03G1764,Gh_…
	GO:0065004	protein-DNA complex assembly	1.3379e-08	Gh_D11G1312,Gh_A09G2488,Gh_A11G1632,Gh_D08G0037,Gh_D12G1518,Gh_D08G0034,Gh_A03G0337,Gh_A01G1880,Gh_D08G0024,Gh_A13G1866,Gh_A08G2548,Gh_A03G0342,Gh_A05G0717,Gh_D08G0048,Gh_A10G0472,Gh_A09G2489,Gh_D13G1403,Gh_A08G0394,Gh_A01G1877,Gh_D01G2137,Gh_A03G0310,Gh_A08G2543,Gh_D03G1245,Gh_D13G2254,Gh_A05G0098,Gh_A09G0836,Gh_D08G2487,Gh_D10G0498,Gh_A08G2531,Gh_A10G0474,Gh_D12G1517,Gh_D08G0035,Gh_A07G1271,Gh_…
	GO:0071824	protein-DNA complex subunit organization	1.3379e-08	Gh_A08G2543,Gh_A03G0310,Gh_D01G2137,Gh_A01G1877,Gh_A08G0394,Gh_D13G1403,Gh_D08G0048,Gh_A10G0472,Gh_A09G2489,Gh_A05G0717,Gh_A03G0342,Gh_A13G1866,Gh_A08G2548,Gh_D08G0024,Gh_A01G1880,Gh_D08G0034,Gh_A03G0337,Gh_D12G1518,Gh_A11G1632,Gh_D08G0037,Gh_D11G1312,Gh_A09G2488,Gh_D05G0161,Gh_D03G1234,Gh_D07G2116,Gh_D08G0751,Gh_D13G2389,Gh_A08G1647,Gh_A07G1900,Gh_A11G1156,Gh_A12G1395,Gh_A13G1990,Gh_A08G2544,Gh_…
	GO:0031497	chromatin assembly	2.4583e-08	Gh_D08G2487,Gh_A10G0474,Gh_D10G0498,Gh_A08G2531,Gh_D08G2486,Gh_A07G1271,Gh_D12G1517,Gh_D08G0035,Gh_D09G0854,Gh_D05G0853,Gh_A08G2115,Gh_A08G2114,Gh_A08G0649,Gh_A08G0011,Gh_D13G2254,Gh_D03G1245,Gh_A05G0098,Gh_A09G0836,Gh_A12G1395,Gh_A11G1156,Gh_A07G1900,Gh_D08G0751,Gh_D13G2389,Gh_A08G1647,Gh_D05G0161,Gh_D03G1234,Gh_D07G2116,Gh_D01G2134,Gh_D09G0853,Gh_A08G2544,Gh_A13G1990,Gh_D08G0024,Gh_A01G1880,Gh_…
	GO:0009698	phenylpropanoid metabolic process	3.0547e-08	Gh_A06G1146,Gh_A09G0262,Gh_A10G0984,Gh_D13G0232,Gh_A05G1188,Gh_A05G0157,Gh_D08G1135,Gh_A08G0993,Gh_D04G1049,Gh_D09G1401,Gh_A13G0989,Gh_A10G0456,Gh_A09G0551,Gh_D05G1811,Gh_A10G0141,Gh_A08G0826,Gh_D04G1243,Gh_D02G0989,Gh_D01G2080,Gh_A03G0465,Gh_D08G1902,Gh_A01G1839,Gh_D10G2461,Gh_A09G0630,Gh_D11G3277,Gh_D11G1009,Gh_D09G0549,Gh_D05G2629,Gh_D08G1998,Gh_D02G2174,Gh_D06G2291,Gh_D12G1163,Gh_D08G0591,Gh_…
	GO:0010075	regulation of meristem growth	3.358e-08	Gh_A01G0996,Gh_A10G1611,Gh_D02G1891,Gh_A13G1964,Gh_D10G1769,Gh_A04G1270,Gh_A13G1684,Gh_A02G1613,Gh_D11G0029,Gh_D10G1867,Gh_D02G1211,Gh_D11G0942,Gh_D05G1785,Gh_A05G1628,Gh_A05G3495,Gh_D03G0717,Gh_A10G0270,Gh_Sca005103G03,Gh_A02G1417,Gh_A06G1840,Gh_D01G1049,Gh_A05G3272,Gh_A05G1963,Gh_D05G0203,Gh_D05G1510,Gh_A03G0126,Gh_A11G0804,Gh_A05G1621,Gh_D07G2303,Gh_D10G1114,Gh_D10G1034,Gh_D01G0573,Gh_D05G1835…
	GO:0010417	glucuronoxylan biosynthetic process	4.8325e-08	Gh_D02G0864,Gh_A11G1802,Gh_A11G0519,Gh_Sca063168G01,Gh_A10G0734,Gh_D06G0142,Gh_D03G0590,Gh_D02G1793,Gh_A02G1486,Gh_A03G1353,Gh_D05G1935,Gh_A01G0568,Gh_D12G1919,Gh_D11G0603,Gh_D09G1426,Gh_A09G1418,Gh_A05G1740,Gh_A06G1849,Gh_D13G1495
	GO:0000038	very long-chain fatty acid metabolic process	6.3624e-08	Gh_D08G1844,Gh_Sca047531G01,Gh_D13G2177,Gh_A10G0567,Gh_D11G0942,Gh_A11G3137,Gh_A13G1813,Gh_D08G1772,Gh_D10G0307,Gh_D08G0945,Gh_A12G1947,Gh_D01G0045,Gh_D03G1205,Gh_D13G1963,Gh_D11G2117,Gh_A09G0551,Gh_A08G1476,Gh_D10G0607,Gh_D03G1035,Gh_D06G0855,Gh_D07G0293,Gh_A03G2073,Gh_A13G0518,Gh_D08G1846,Gh_D02G1726,Gh_A07G1431,Gh_D05G1846,Gh_A11G0232,Gh_A08G1543,Gh_A03G2065,Gh_A01G1047,Gh_D09G0549,Gh_D11G0246…
	GO:0042335	cuticle development	1.4008e-07	Gh_D08G1772,Gh_A13G1813,Gh_D11G0942,Gh_A10G0567,Gh_D13G2177,Gh_Sca047531G01,Gh_D08G1844,Gh_D03G1035,Gh_D10G0607,Gh_A08G1476,Gh_A09G0551,Gh_D13G1963,Gh_D01G0045,Gh_D03G1205,Gh_D05G0205,Gh_D10G0307,Gh_D08G0945,Gh_A03G2065,Gh_A08G1543,Gh_A11G0232,Gh_D05G1846,Gh_D08G1846,Gh_A07G1431,Gh_D02G1726,Gh_A03G2073,Gh_D13G1008,Gh_D07G0293,Gh_D06G0855,Gh_A03G1286,Gh_A10G2222,Gh_D06G1975,Gh_A11G0804,Gh_A12G1044…
	GO:0035266	meristem growth	1.5667e-07	Gh_A05G2653,Gh_D06G0879,Gh_A09G0630,Gh_A08G0457,Gh_A05G1599,Gh_D04G1897,Gh_A06G1836,Gh_Sca074602G01,Gh_D03G0222,Gh_D09G0628,Gh_D13G0639,Gh_D05G2190,Gh_Sca005023G04,Gh_A07G1793,Gh_D09G1534,Gh_D11G3416,Gh_A10G1075,Gh_D08G2000,Gh_A09G0065,Gh_D02G1656,Gh_A05G0140,Gh_D06G2291,Gh_D05G3251,Gh_D02G2174,Gh_A07G1710,Gh_A07G2085,Gh_D07G0162,Gh_A07G1450,Gh_A03G1222,Gh_Sca077568G01,Gh_D13G2360,Gh_D08G0544,Gh_…
	GO:0006323	DNA packaging	1.7462e-07	Gh_A12G1395,Gh_A11G1156,Gh_A07G1900,Gh_D13G2389,Gh_D08G0751,Gh_A08G1647,Gh_D05G0161,Gh_D07G2116,Gh_D03G1234,Gh_D01G2134,Gh_D09G0853,Gh_A08G2544,Gh_A13G1990,Gh_D08G2487,Gh_A10G0474,Gh_D10G0498,Gh_A08G2531,Gh_A07G1271,Gh_D08G2486,Gh_D08G0035,Gh_D12G1517,Gh_D05G0853,Gh_D09G0854,Gh_A08G2115,Gh_A08G0011,Gh_A08G2114,Gh_A08G0649,Gh_D13G2254,Gh_D03G1245,Gh_A09G0836,Gh_A05G0098,Gh_A03G0310,Gh_A08G2543,Gh_…
	GO:0034637	cellular carbohydrate biosynthetic process	1.9545e-07	Gh_D05G2141,Gh_D01G1541,Gh_A01G0658,Gh_D12G0677,Gh_A12G1285,Gh_A12G1076,Gh_D11G1378,Gh_D02G1960,Gh_A03G1070,Gh_A07G1545,Gh_A08G1599,Gh_D05G2057,Gh_D03G0919,Gh_A06G1865,Gh_A01G0564,Gh_A11G2468,Gh_D05G1935,Gh_A11G1802,Gh_A10G0080,Gh_D11G2698,Gh_A11G1469,Gh_A13G0989,Gh_D03G1125,Gh_A10G0734,Gh_D10G0271,Gh_D08G0936,Gh_D12G2112,Gh_A02G0669,Gh_A06G1849,Gh_A03G1509,Gh_D04G1243,Gh_D04G1266,Gh_A03G0465,Gh_…
	GO:0009809	lignin biosynthetic process	1.0948e-06	Gh_D03G1419,Gh_D08G1135,Gh_D03G0457,Gh_A09G0630,Gh_A08G0993,Gh_A05G1579,Gh_D04G1243,Gh_A09G0262,Gh_A10G1518,Gh_A04G1207,Gh_A01G1948,Gh_D08G0952,Gh_A03G2176,Gh_D11G3322,Gh_A11G2936,Gh_A08G0826,Gh_D02G2146,Gh_D09G0628,Gh_A10G0141,Gh_D05G2629,Gh_D05G1123,Gh_D10G1769,Gh_A05G1005,Gh_D09G0262,Gh_A03G0166,Gh_D12G0195,Gh_A02G1320,Gh_D08G1266
	GO:0009699	phenylpropanoid biosynthetic process	1.2385e-06	Gh_D03G1419,Gh_D10G2528,Gh_A10G0984,Gh_A05G0157,Gh_D08G1135,Gh_A08G0993,Gh_A08G0107,Gh_A10G1835,Gh_D05G2834,Gh_A06G1146,Gh_A09G0262,Gh_A11G2891,Gh_A04G1207,Gh_D05G2607,Gh_A01G1948,Gh_A09G0551,Gh_D08G0952,Gh_A08G1593,Gh_A10G1846,Gh_A10G0141,Gh_D02G2146,Gh_A08G0826,Gh_D09G1401,Gh_D10G1769,Gh_D08G1266,Gh_A02G0879,Gh_A09G0630,Gh_D03G0457,Gh_D11G3277,Gh_D04G1243,Gh_D01G2080,Gh_A05G1579,Gh_A10G1518,Gh_…
	GO:0043473	pigmentation	2.6348e-06	Gh_A07G1077,Gh_D10G1769,Gh_D09G0908,Gh_D04G0649,Gh_A13G1964,Gh_D11G2117,Gh_D09G1855,Gh_A07G1448,Gh_A06G0351,Gh_A05G3634,Gh_D05G1805,Gh_D10G0607,Gh_A08G1710,Gh_D11G0582,Gh_A05G2874,Gh_A04G1207,Gh_A03G1978,Gh_A02G1417,Gh_D11G0942,Gh_D09G0181,Gh_D05G1785,Gh_A10G0567,Gh_A07G1418,Gh_D10G1437,Gh_A11G3137,Gh_A07G1332,Gh_A03G1222,Gh_D13G2360,Gh_D02G1656,Gh_A07G1847,Gh_A10G1075,Gh_A05G1621,Gh_A03G2182,Gh_…
	GO:0043481	anthocyanin accumulation in tissues in response to UV light	2.8549e-06	Gh_D09G0181,Gh_A10G0567,Gh_D05G1785,Gh_D11G0942,Gh_A11G3137,Gh_A07G1418,Gh_D10G1437,Gh_D11G0582,Gh_A05G2874,Gh_A08G1710,Gh_A02G1417,Gh_A03G1978,Gh_D09G1855,Gh_D11G2117,Gh_A07G1448,Gh_D05G1805,Gh_D10G0607,Gh_A06G0351,Gh_A05G3634,Gh_D04G0649,Gh_D10G1769,Gh_A07G1077,Gh_D09G0908,Gh_A13G1964,Gh_A06G1836,Gh_A05G1599,Gh_A04G0767,Gh_A02G0879,Gh_A09G0630,Gh_A03G2165,Gh_Sca091430G01,Gh_D05G3049,Gh_A05G2653…
	GO:0043476	pigment accumulation	2.8549e-06	Gh_A11G3137,Gh_A07G1418,Gh_D10G1437,Gh_D09G0181,Gh_D05G1785,Gh_A10G0567,Gh_D11G0942,Gh_A03G1978,Gh_A02G1417,Gh_D11G0582,Gh_A05G2874,Gh_A08G1710,Gh_D10G0607,Gh_D05G1805,Gh_A06G0351,Gh_A05G3634,Gh_D09G1855,Gh_D11G2117,Gh_A07G1448,Gh_A13G1964,Gh_D04G0649,Gh_D10G1769,Gh_A07G1077,Gh_D09G0908,Gh_A02G0879,Gh_A09G0630,Gh_A03G2165,Gh_D05G3049,Gh_Sca091430G01,Gh_A05G2653,Gh_A06G1836,Gh_A05G1599,Gh_A04G0767…
	GO:0043478	pigment accumulation in response to UV light	2.8549e-06	Gh_A12G0426,Gh_A03G1286,Gh_A07G1625,Gh_A11G0504,Gh_D09G0628,Gh_A11G0804,Gh_D05G1510,Gh_D02G2369,Gh_D12G2171,Gh_D02G1656,Gh_A10G1075,Gh_A03G2182,Gh_A07G1847,Gh_A05G1621,Gh_A07G1332,Gh_A03G1222,Gh_D13G2360,Gh_D05G3049,Gh_Sca091430G01,Gh_A05G2653,Gh_A02G0879,Gh_A09G0630,Gh_A03G2165,Gh_A05G1599,Gh_A04G0767,Gh_A06G1836,Gh_A03G0129,Gh_D08G1846,Gh_D02G1726,Gh_D13G0255,Gh_D07G1517,Gh_D06G2276,Gh_D07G1541…
	GO:0043480	pigment accumulation in tissues	2.8549e-06	Gh_D04G0649,Gh_D09G0908,Gh_D10G1769,Gh_A07G1077,Gh_A13G1964,Gh_A07G1448,Gh_D09G1855,Gh_D11G2117,Gh_D05G1805,Gh_D10G0607,Gh_A05G3634,Gh_A06G0351,Gh_A05G2874,Gh_D11G0582,Gh_A08G1710,Gh_A02G1417,Gh_A03G1978,Gh_A10G0567,Gh_D05G1785,Gh_D09G0181,Gh_D11G0942,Gh_A11G3137,Gh_D10G1437,Gh_A07G1418,Gh_A03G1222,Gh_D13G2360,Gh_A07G1332,Gh_A07G1847,Gh_A10G1075,Gh_A05G1621,Gh_A03G2182,Gh_D02G1656,Gh_D12G2171,Gh_…
	GO:0043479	pigment accumulation in tissues in response to UV light	2.8549e-06	Gh_A11G3137,Gh_A07G1418,Gh_D10G1437,Gh_D09G0181,Gh_A10G0567,Gh_D05G1785,Gh_D11G0942,Gh_A03G1978,Gh_A02G1417,Gh_A05G2874,Gh_D11G0582,Gh_A08G1710,Gh_D05G1805,Gh_D10G0607,Gh_A06G0351,Gh_A05G3634,Gh_D09G1855,Gh_D11G2117,Gh_A07G1448,Gh_A13G1964,Gh_D04G0649,Gh_A07G1077,Gh_D10G1769,Gh_D09G0908,Gh_A02G0879,Gh_A09G0630,Gh_A03G2165,Gh_Sca091430G01,Gh_D05G3049,Gh_A05G2653,Gh_A06G1836,Gh_A05G1599,Gh_A04G0767…
	GO:0009612	response to mechanical stimulus	3.7976e-06	Gh_D03G0067,Gh_A05G0310,Gh_D05G1397,Gh_A06G0744,Gh_D06G0746,Gh_A08G0068,Gh_A02G1655,Gh_A08G0833,Gh_A05G1219,Gh_D12G1785,Gh_D08G0109,Gh_D08G0946,Gh_D13G0147,Gh_A05G3980,Gh_A13G0128,Gh_A09G0923,Gh_D11G1750,Gh_D08G2556,Gh_Sca090787G01,Gh_A11G1592,Gh_A12G1642,Gh_D05G0412,Gh_D01G0551,Gh_D09G0953
	GO:0044085	cellular component biogenesis	5.4877e-06	Gh_A01G0494,Gh_D06G1953,Gh_Sca091430G01,Gh_D09G1753,Gh_A11G1632,Gh_D03G1455,Gh_A02G1492,Gh_D07G2083,Gh_A12G2250,Gh_A03G0129,Gh_A10G0472,Gh_D09G0865,Gh_D01G1302,Gh_A03G1097,Gh_A07G1625,Gh_D13G2200,Gh_A03G0126,Gh_D05G1510,Gh_D05G2429,Gh_D02G1877,Gh_D08G1527,Gh_A05G1621,Gh_A06G1457,Gh_A08G2543,Gh_A11G1127,Gh_A01G0568,Gh_D05G1785,Gh_D09G1426,Gh_A05G1354,Gh_A09G1570,Gh_D12G2588,Gh_Sca005103G03,Gh_A09G…
	GO:0044711	single-organism biosynthetic process	7.3264e-06	Gh_D01G0045,Gh_D05G2420,Gh_A10G0504,Gh_A03G1219,Gh_D10G2125,Gh_D09G0908,Gh_A11G0165,Gh_D02G2146,Gh_A12G1261,Gh_D12G1930,Gh_D12G1982,Gh_A06G1840,Gh_A09G1748,Gh_D05G2340,Gh_A10G1835,Gh_D09G0045,Gh_A05G2843,Gh_A04G0460,Gh_A02G1613,Gh_D04G0513,Gh_A03G1114,Gh_A05G3948,Gh_A07G1878,Gh_D10G1114,Gh_A03G0620,Gh_D01G0573,Gh_A11G2345,Gh_A05G1005,Gh_D05G0203,Gh_D11G3322,Gh_D12G0199,Gh_A02G0242,Gh_A10G1541,Gh_…
	GO:0008202	steroid metabolic process	8.5211e-06	Gh_D04G1038,Gh_D01G1673,Gh_A09G2255,Gh_A01G0606,Gh_D05G0184,Gh_D12G0344,Gh_A02G0879,Gh_D08G1701,Gh_A03G2073,Gh_D07G0724,Gh_A07G2174,Gh_D05G0189,Gh_D05G2425,Gh_A03G0129,Gh_A05G0525,Gh_D13G0255,Gh_D01G0619,Gh_D05G1933,Gh_D05G0203,Gh_A07G1459,Gh_A08G1751,Gh_D10G1114,Gh_A02G0266,Gh_D05G1785,Gh_D11G0752,Gh_D09G1859,Gh_A01G1485,Gh_A08G1406,Gh_D12G1982,Gh_A09G1748,Gh_D09G2194,Gh_D06G0296,Gh_A09G0022,Gh_…
	GO:0006694	steroid biosynthetic process	1.1227e-05	Gh_A12G1811,Gh_D03G0111,Gh_D03G1205,Gh_A07G1077,Gh_D09G1857,Gh_A08G0826,Gh_D05G1811,Gh_A11G1380,Gh_D10G1242,Gh_D09G1152,Gh_D07G0873,Gh_A13G1753,Gh_D08G0544,Gh_D03G0412,Gh_A05G1516,Gh_D02G1993,Gh_A05G0140,Gh_D13G2360,Gh_Sca007466G01,Gh_A07G1710,Gh_A05G2165,Gh_A03G2157,Gh_D08G0591,Gh_A03G2176,Gh_A11G0640,Gh_A07G0812,Gh_A05G1862,Gh_D04G1238,Gh_A03G2065,Gh_A05G1566,Gh_D11G0941,Gh_D05G0646,Gh_A07G0648…
	GO:0044723	single-organism carbohydrate metabolic process	1.5435e-05	Gh_D01G1177,Gh_D11G0447,Gh_A04G0847,Gh_D05G0079,Gh_D06G2276,Gh_A05G1125,Gh_A08G1080,Gh_A05G1566,Gh_A09G0630,Gh_D03G0455,Gh_D12G0446,Gh_D07G1759,Gh_A13G1807,Gh_D04G0937,Gh_D02G2124,Gh_A12G2049,Gh_A11G1091,Gh_A13G1686,Gh_D02G1480,Gh_A08G0474,Gh_D12G2509,Gh_D02G1928,Gh_A10G1937,Gh_D05G0432,Gh_D10G0059,Gh_D09G1272,Gh_A05G0574,Gh_A08G1710,Gh_A09G1276,Gh_D13G2174,Gh_D04G1345,Gh_D10G0324,Gh_D04G1049,Gh_…
	GO:0009926	auxin polar transport	1.8489e-05	Gh_A04G0265,Gh_A10G1611,Gh_D05G1805,Gh_D10G0607,Gh_D07G1737,Gh_D13G2472,Gh_A06G0351,Gh_A05G3634,Gh_A09G1399,Gh_D10G1769,Gh_A09G1270,Gh_D08G1375,Gh_D01G0474,Gh_D09G0181,Gh_A10G0567,Gh_D05G1785,Gh_D11G0942,Gh_D05G3434,Gh_D10G1867,Gh_D06G1086,Gh_D10G1437,Gh_A03G0656,Gh_D04G1899,Gh_A03G1978,Gh_D07G1895,Gh_D09G1272,Gh_A12G1091,Gh_A01G2050,Gh_A11G0804,Gh_D05G1510,Gh_D02G2369,Gh_D05G0203,Gh_D01G0299,Gh_…
	GO:0060918	auxin transport	7.0466e-05	Gh_D06G0487,Gh_A10G1518,Gh_D11G0869,Gh_D08G1846,Gh_A13G2316,Gh_A09G0124,Gh_A04G0767,Gh_D05G3262,Gh_D05G3049,Gh_A06G0923,Gh_D07G0761,Gh_D10G1114,Gh_A05G1621,Gh_A11G0804,Gh_D05G1510,Gh_D02G2369,Gh_A01G2050,Gh_A07G1625,Gh_D05G0203,Gh_A08G0801,Gh_D04G1899,Gh_A03G1978,Gh_D11G0942,Gh_D05G3434,Gh_D10G1867,Gh_D01G0345,Gh_A10G0567,Gh_D05G1785,Gh_D10G1769,Gh_D08G1375,Gh_A10G1611,Gh_A06G0351,Gh_D10G0607,Gh_…
	GO:0071103	DNA conformation change	7.7871e-05	Gh_D08G0024,Gh_A01G1880,Gh_A03G0342,Gh_A13G1866,Gh_A08G2548,Gh_A05G0717,Gh_A09G2489,Gh_D08G0048,Gh_A10G0472,Gh_D11G1312,Gh_A09G2488,Gh_A10G1460,Gh_D12G1518,Gh_D08G0037,Gh_A11G1632,Gh_D08G0034,Gh_A03G0337,Gh_A03G0310,Gh_A08G2543,Gh_A01G1877,Gh_A08G0394,Gh_D13G1403,Gh_A03G2176,Gh_D01G2137,Gh_D08G2487,Gh_A10G0474,Gh_D10G0498,Gh_A08G2531,Gh_D08G2486,Gh_A07G1271,Gh_D08G0035,Gh_D12G1517,Gh_D09G0854,Gh_…
	GO:0009962	regulation of flavonoid biosynthetic process	8.8118e-05	Gh_D07G1679,Gh_D11G0139,Gh_A04G0160,Gh_A07G0236,Gh_A06G1664,Gh_A05G1718,Gh_D03G1601,Gh_A05G1005,Gh_D04G0893,Gh_D07G0162,Gh_D11G1009,Gh_D05G1123,Gh_D08G1998,Gh_A08G1488,Gh_D06G0879,Gh_A10G1345,Gh_D03G1764,Gh_A04G0155,Gh_D05G1596,Gh_D05G2784,Gh_A05G3601,Gh_A04G0265,Gh_D01G0474,Gh_D02G0404,Gh_D03G1849,Gh_D08G2013,Gh_A12G2265,Gh_D13G2490,Gh_A03G0010,Gh_A04G0460,Gh_D09G2147,Gh_A05G3782,Gh_D05G3434,Gh_…
	GO:0010393	galacturonan metabolic process	9.3967e-05	Gh_A11G0640,Gh_A06G0540,Gh_D11G0139,Gh_A05G2165,Gh_A12G2578,Gh_A09G1159,Gh_A03G1380,Gh_D10G1034,Gh_A06G0284,Gh_D07G0380,Gh_A07G0050,Gh_D11G3139,Gh_A12G2251,Gh_D09G1753,Gh_D01G1673,Gh_D02G1819,Gh_A04G0787,Gh_A12G0322,Gh_D12G0344,Gh_D07G2348,Gh_A13G2180,Gh_D01G1218,Gh_D05G0079,Gh_A03G0465,Gh_A12G2250,Gh_A05G3601,Gh_D11G2409,Gh_D12G0542,Gh_D10G1593,Gh_A03G0097,Gh_D07G0060,Gh_D13G0974,Gh_D06G0604,Gh_…
	GO:0045488	pectin metabolic process	9.3967e-05	Gh_A05G2165,Gh_D11G0139,Gh_A11G0640,Gh_A06G0540,Gh_D11G3139,Gh_D10G1034,Gh_D07G0380,Gh_A07G0050,Gh_A06G0284,Gh_A03G1380,Gh_A12G2578,Gh_A09G1159,Gh_A13G2180,Gh_D07G2348,Gh_D12G0344,Gh_D02G1819,Gh_D01G1673,Gh_A04G0787,Gh_A12G0322,Gh_A12G2251,Gh_D09G1753,Gh_A12G2250,Gh_A03G0465,Gh_D05G0079,Gh_D01G1218,Gh_D13G0974,Gh_D07G0060,Gh_A03G0097,Gh_D12G0542,Gh_D10G1593,Gh_D11G2409,Gh_A05G3601,Gh_D05G2420,Gh_…
	GO:0009825	multidimensional cell growth	9.8484e-05	Gh_A05G2653,Gh_D07G2348,Gh_A09G0630,Gh_A05G1566,Gh_A03G2165,Gh_A05G1599,Gh_A06G1836,Gh_D02G1726,Gh_D07G1517,Gh_D06G2276,Gh_A10G0760,Gh_A03G1286,Gh_D09G0628,Gh_D12G2171,Gh_D02G1656,Gh_A03G2182,Gh_A10G1075,Gh_D02G1269,Gh_A07G1847,Gh_A03G1222,Gh_D13G2360,Gh_D10G1437,Gh_A07G0664,Gh_D09G0181,Gh_D12G1474,Gh_A08G1710,Gh_A05G3634,Gh_D05G1805,Gh_A07G1077,Gh_A11G1151,Gh_Sca091430G01,Gh_D05G3049,Gh_A02G0879…
	GO:0043450	alkene biosynthetic process	0.00015143	Gh_A11G2218,Gh_D06G1417,Gh_A07G1240,Gh_A05G1339,Gh_A08G1100,Gh_D03G0678,Gh_A08G0068,Gh_A03G1385,Gh_D02G1805,Gh_A10G2093,Gh_D08G0109,Gh_A12G2673,Gh_D08G0946,Gh_A05G3980,Gh_D13G0174,Gh_A09G0923,Gh_D05G1663,Gh_A06G1742,Gh_A06G1341,Gh_D06G2235,Gh_A07G0773,Gh_D08G0546,Gh_D03G1348,Gh_D05G2535,Gh_D05G1508,Gh_D09G0953,Gh_D10G2363,Gh_A07G0774,Gh_D07G0107,Gh_A05G1492,Gh_A05G1821,Gh_A08G0460,Gh_D12G2746,Gh_…
	GO:0043449	cellular alkene metabolic process	0.00015143	Gh_D05G2018,Gh_D11G2527,Gh_D12G1982,Gh_D07G1349,Gh_D07G0599,Gh_D12G1407,Gh_A12G1285,Gh_A05G3681,Gh_D04G0302,Gh_D05G1507,Gh_A06G2028,Gh_A09G1391,Gh_D12G2746,Gh_A12G1811,Gh_A05G1492,Gh_D07G0107,Gh_A05G1821,Gh_A07G0774,Gh_A08G0460,Gh_A08G0833,Gh_D12G0773,Gh_A06G1341,Gh_A06G1742,Gh_D06G2235,Gh_D13G0174,Gh_A05G3980,Gh_D05G1663,Gh_A09G0923,Gh_D10G2363,Gh_D09G0953,Gh_D08G0546,Gh_A07G0773,Gh_D05G1508,Gh_…
	GO:1900674	olefin biosynthetic process	0.00021608	Gh_D12G0773,Gh_A08G0833,Gh_A12G1811,Gh_D12G2746,Gh_A08G0460,Gh_A07G0774,Gh_D07G0107,Gh_A05G1821,Gh_A05G1492,Gh_D04G0302,Gh_A12G1285,Gh_A05G3681,Gh_D12G1407,Gh_D07G0599,Gh_D07G1349,Gh_A09G1391,Gh_D05G1507,Gh_A06G2028,Gh_D05G2018,Gh_D12G1982,Gh_D11G2527,Gh_D08G0946,Gh_A10G2093,Gh_A12G2673,Gh_D08G0109,Gh_D02G1805,Gh_D03G0678,Gh_A08G0068,Gh_A03G1385,Gh_A05G1339,Gh_A08G1100,Gh_D06G1417,Gh_A11G2218,Gh_…
	GO:1900673	olefin metabolic process	0.00021608	Gh_D02G1805,Gh_D08G0946,Gh_D08G0109,Gh_A12G2673,Gh_A10G2093,Gh_A07G1240,Gh_D06G1417,Gh_A11G2218,Gh_A03G1385,Gh_A08G0068,Gh_D03G0678,Gh_A08G1100,Gh_A05G1339,Gh_D05G2535,Gh_D03G1348,Gh_D05G1508,Gh_D08G0546,Gh_A07G0773,Gh_D10G2363,Gh_D09G0953,Gh_D05G1663,Gh_A09G0923,Gh_D13G0174,Gh_A05G3980,Gh_D06G2235,Gh_A06G1341,Gh_A06G1742,Gh_A08G0833,Gh_D12G0773,Gh_A08G0460,Gh_A05G1821,Gh_D07G0107,Gh_A05G1492,Gh_…
	GO:0048767	root hair elongation	0.0002585	Gh_D03G0544,Gh_A02G0879,Gh_Sca091430G01,Gh_D05G3049,Gh_A08G0896,Gh_D02G0905,Gh_A05G1759,Gh_A04G0767,Gh_D13G0255,Gh_A03G0129,Gh_D08G1846,Gh_A09G1746,Gh_A10G1518,Gh_Sca074481G01,Gh_D08G2355,Gh_D07G1541,Gh_A01G0900,Gh_A11G0504,Gh_D03G0098,Gh_A07G1625,Gh_A08G2296,Gh_D05G1510,Gh_A11G0804,Gh_D02G2369,Gh_A05G1621,Gh_A02G0513,Gh_D09G2057,Gh_D10G2082,Gh_A10G1817,Gh_D12G2774,Gh_A11G3137,Gh_A07G1418,Gh_A02G…
	GO:0019566	arabinose metabolic process	0.00027047	Gh_A06G1599,Gh_D07G1237,Gh_D10G0059,Gh_A10G0052,Gh_A01G1635,Gh_D01G1827,Gh_D06G1953,Gh_A07G1141
	GO:0006333	chromatin assembly or disassembly	0.00027401	Gh_A08G0011,Gh_A08G0649,Gh_A08G2114,Gh_D09G0854,Gh_A08G2115,Gh_D05G0853,Gh_D08G0035,Gh_D12G1517,Gh_D08G2486,Gh_A07G1271,Gh_A08G2531,Gh_D10G0498,Gh_A10G0474,Gh_D08G2487,Gh_D13G2254,Gh_A05G0098,Gh_D03G1245,Gh_A09G0836,Gh_D07G2116,Gh_D03G1234,Gh_D05G0161,Gh_A08G1647,Gh_D08G0751,Gh_D13G2389,Gh_A11G1156,Gh_A07G1900,Gh_A05G0082,Gh_A12G1395,Gh_A13G1990,Gh_D05G0543,Gh_D06G1036,Gh_A08G2544,Gh_D09G0853,Gh_…
	GO:0048638	regulation of developmental growth	0.00030438	Gh_A08G1146,Gh_A01G0564,Gh_D06G0604,Gh_A12G0411,Gh_D05G1966,Gh_A13G0500,Gh_D05G1811,Gh_A05G3634,Gh_D05G1805,Gh_D12G2442,Gh_A12G2524,Gh_A11G0031,Gh_A07G1607,Gh_D02G0352,Gh_A12G1579,Gh_D07G1895,Gh_A05G1594,Gh_A10G0735,Gh_A09G0533,Gh_D08G0544,Gh_D10G1437,Gh_A12G2306,Gh_A07G1710,Gh_D02G2174,Gh_D12G1711,Gh_D05G3251,Gh_D13G2360,Gh_Sca077568G01,Gh_A03G1222,Gh_A07G2085,Gh_D07G0162,Gh_A07G1450,Gh_A05G0140…
	GO:0008361	regulation of cell size	0.00032658	Gh_A10G1611,Gh_A04G0265,Gh_A05G3634,Gh_D05G1805,Gh_D10G0607,Gh_D10G1769,Gh_D01G0474,Gh_D10G1867,Gh_D11G0942,Gh_D05G3434,Gh_D05G1785,Gh_A10G0567,Gh_D09G0181,Gh_D10G1437,Gh_A12G2206,Gh_D07G1895,Gh_D02G2369,Gh_D05G1510,Gh_A11G0804,Gh_A07G1625,Gh_A12G0426,Gh_D09G0628,Gh_D05G0203,Gh_A03G1222,Gh_A10G1075,Gh_A05G1621,Gh_D02G1656,Gh_D10G1114,Gh_A05G0140,Gh_A04G0767,Gh_A05G1599,Gh_A06G1836,Gh_D05G3049,Gh_…
	GO:0008150	biological_process	0.000511	Gh_D05G1507,Gh_D05G0080,Gh_D11G0752,Gh_D09G2294,Gh_Sca079112G01,Gh_D12G0245,Gh_D13G0188,Gh_A08G1784,Gh_A01G1001,Gh_D13G0564,Gh_A07G1141,Gh_D12G1074,Gh_D09G0712,Gh_D10G0531,Gh_D05G1975,Gh_D05G0339,Gh_A03G0021,Gh_A13G2239,Gh_D10G0253,Gh_A08G2220,Gh_A05G2623,Gh_D09G0521,Gh_A05G1821,Gh_A08G1046,Gh_A12G1778,Gh_A05G3147,Gh_D11G2613,Gh_A06G0203,Gh_D02G0724,Gh_A12G2251,Gh_D03G0367,Gh_D13G1857,Gh_D10G2298…
	GO:0006066	alcohol metabolic process	0.00065284	Gh_A05G1516,Gh_D03G0412,Gh_A05G0140,Gh_D02G1993,Gh_Sca007466G01,Gh_D13G2360,Gh_A07G1710,Gh_A05G2165,Gh_D05G2363,Gh_A03G2157,Gh_D11G3073,Gh_D08G0591,Gh_A05G0122,Gh_D10G1564,Gh_A07G1441,Gh_A07G0812,Gh_A11G0640,Gh_A03G2176,Gh_A06G0600,Gh_A05G1862,Gh_D12G2002,Gh_D05G2583,Gh_D04G1238,Gh_Sca009545G01,Gh_A05G1566,Gh_A03G2065,Gh_D11G0941,Gh_D05G0646,Gh_D01G1723,Gh_A07G0648,Gh_D05G1294,Gh_D11G0563,Gh_A12G…
	GO:0044699	single-organism process	0.00069612	Gh_D11G2660,Gh_D05G0379,Gh_D06G1610,Gh_A03G0265,Gh_A12G2102,Gh_D02G1694,Gh_A10G1345,Gh_A12G2263,Gh_A05G3304,Gh_D09G1190,Gh_A05G0845,Gh_A08G1120,Gh_D08G1846,Gh_A07G1949,Gh_D13G1880,Gh_D05G1755,Gh_D02G1236,Gh_A05G3468,Gh_D11G0772,Gh_A01G1797,Gh_D06G1551,Gh_D05G0880,Gh_D05G2857,Gh_D05G3348,Gh_D02G0404,Gh_D09G1582,Gh_D11G3099,Gh_D11G0074,Gh_D07G1157,Gh_A13G0531,Gh_A01G0753,Gh_D11G0942,Gh_D10G1867,Gh_…
	GO:0040008	regulation of growth	0.00071	Gh_A11G3137,Gh_D11G0029,Gh_A02G1613,Gh_A05G0399,Gh_A05G1628,Gh_A05G3495,Gh_D05G1785,Gh_D02G1211,Gh_D11G0942,Gh_D10G1867,Gh_A02G1417,Gh_Sca005103G03,Gh_A10G0270,Gh_D05G1751,Gh_D03G0717,Gh_A06G1840,Gh_D01G1049,Gh_A12G2047,Gh_D11G1752,Gh_D11G2117,Gh_A06G1806,Gh_D02G1891,Gh_A10G1611,Gh_D07G0060,Gh_A01G0996,Gh_A13G1964,Gh_A04G1270,Gh_A13G1684,Gh_D10G1769,Gh_D05G3049,Gh_D09G0529,Gh_D04G0838,Gh_D05G1835…
	GO:0080051	cutin transport	0.00083744	Gh_D02G1202,Gh_D09G1062,Gh_D07G0603,Gh_A07G0534,Gh_A03G0786
	GO:0010105	negative regulation of ethylene mediated signaling pathway	0.0010397	Gh_D12G1291,Gh_A04G0305,Gh_A13G1607,Gh_A13G1254,Gh_A11G2273,Gh_A01G2016,Gh_A08G2220,Gh_D05G3348,Gh_D01G0450,Gh_D01G0133,Gh_D13G1966
	GO:0070298	negative regulation of phosphorelay signal transduction system	0.0010397	Gh_A08G2220,Gh_A01G2016,Gh_A13G1607,Gh_A13G1254,Gh_A11G2273,Gh_D12G1291,Gh_A04G0305,Gh_D13G1966,Gh_D05G3348,Gh_D01G0450,Gh_D01G0133
	GO:0030198	extracellular matrix organization	0.001134	Gh_D01G1049,Gh_D03G0222,Gh_A02G0513,Gh_A03G0631,Gh_A02G1492,Gh_D03G0919,Gh_D05G1966,Gh_A08G0474,Gh_D10G1749,Gh_A01G0996,Gh_A10G1503,Gh_D11G1626,Gh_A07G1625,Gh_A11G1469
	GO:0043062	extracellular structure organization	0.001134	Gh_A07G1625,Gh_A11G1469,Gh_A10G1503,Gh_D11G1626,Gh_A08G0474,Gh_D10G1749,Gh_A01G0996,Gh_D05G1966,Gh_A02G1492,Gh_D03G0919,Gh_A03G0631,Gh_D03G0222,Gh_D01G1049,Gh_A02G0513
	GO:0046373	L-arabinose metabolic process	0.0011467	Gh_D07G1237,Gh_D01G1827,Gh_A07G1141,Gh_A01G1635
	GO:0044283	small molecule biosynthetic process	0.00134	Gh_D12G1163,Gh_A05G2496,Gh_D06G0417,Gh_D07G0936,Gh_D13G2360,Gh_D09G0861,Gh_D01G0568,Gh_A03G1286,Gh_D02G1805,Gh_A07G1441,Gh_A07G0468,Gh_D05G3896,Gh_A03G2176,Gh_A09G0764,Gh_D06G2288,Gh_D02G1726,Gh_A13G0352,Gh_A08G1067,Gh_D13G1272,Gh_D07G1365,Gh_D09G1177,Gh_A10G1383,Gh_A08G0457,Gh_A12G0322,Gh_A03G2151,Gh_A07G1255,Gh_D11G0563,Gh_D08G1348,Gh_A02G1113,Gh_Sca006141G01,Gh_D03G1205,Gh_A07G0124,Gh_A12G0411…
	GO:0009813	flavonoid biosynthetic process	0.0015699	Gh_D11G1009,Gh_D07G0162,Gh_D09G0549,Gh_A11G1616,Gh_D08G1998,Gh_D12G0566,Gh_D03G1601,Gh_D11G0139,Gh_D07G1679,Gh_A07G0236,Gh_D03G0479,Gh_A07G1098,Gh_D08G1902,Gh_D06G2155,Gh_A04G0155,Gh_D08G1731,Gh_D06G0879,Gh_A01G0434,Gh_D03G1764,Gh_D04G1926,Gh_D08G2013,Gh_A12G2265,Gh_D01G0474,Gh_A04G0265,Gh_A05G3601,Gh_A09G0551,Gh_D05G1836,Gh_A08G0826,Gh_A08G1437,Gh_A05G1424,Gh_A01G0964,Gh_D03G0102,Gh_A10G1443,Gh_…
	GO:0009800	cinnamic acid biosynthetic process	0.0016489	Gh_D05G2607,Gh_A11G2891,Gh_A01G1839,Gh_D09G1401,Gh_A10G1835,Gh_D01G2080,Gh_D11G3277,Gh_D10G2528
	GO:0009803	cinnamic acid metabolic process	0.0016489	Gh_A10G1835,Gh_D09G1401,Gh_D01G2080,Gh_A11G2891,Gh_D05G2607,Gh_A01G1839,Gh_D10G2528,Gh_D11G3277
	GO:0007231	osmosensory signaling pathway	0.0017615	Gh_D05G2471,Gh_D11G1750,Gh_D03G0067,Gh_A11G1592,Gh_D12G2750,Gh_A02G1655,Gh_A13G0267,Gh_A05G2211
	GO:0010430	fatty acid omega-oxidation	0.0019857	Gh_D10G0552,Gh_A05G1124,Gh_A10G2254,Gh_D05G1294
	GO:0006972	hyperosmotic response	0.0020766	Gh_A04G0301,Gh_A07G1625,Gh_A10G1541,Gh_A02G0242,Gh_D10G0328,Gh_D04G0893,Gh_A04G1393,Gh_D09G2057,Gh_A06G1910,Gh_D02G0341,Gh_D05G1342,Gh_A07G1199,Gh_A03G1944,Gh_D11G0314,Gh_A10G1518,Gh_D09G0571,Gh_A07G0437,Gh_A01G0993,Gh_A04G0700,Gh_A03G0129,Gh_D07G1300,Gh_D05G3352,Gh_A06G1229,Gh_D05G0731,Gh_A05G2383,Gh_A05G3468,Gh_D11G3268,Gh_D06G1036,Gh_D05G0543,Gh_A03G1760,Gh_D02G2146,Gh_D07G0107,Gh_D10G1769,Gh_…
	GO:0007638	mechanosensory behavior	0.0023702	Gh_A11G1592,Gh_D11G1750,Gh_A02G1655,Gh_D03G0067
	GO:0044708	single-organism behavior	0.0023702	Gh_D11G1750,Gh_A02G1655,Gh_D03G0067,Gh_A11G1592
	GO:0021700	developmental maturation	0.0024418	Gh_A05G2653,Gh_D10G1702,Gh_A03G2165,Gh_A05G1599,Gh_A06G1836,Gh_D13G1475,Gh_A06G1341,Gh_D07G1517,Gh_A05G2315,Gh_D09G0628,Gh_D12G2171,Gh_D02G1656,Gh_A07G1847,Gh_A03G2182,Gh_A10G1075,Gh_D05G1283,Gh_A07G1332,Gh_A05G3533,Gh_A05G0641,Gh_D10G1437,Gh_A01G0618,Gh_D08G1096,Gh_D01G1313,Gh_A08G1599,Gh_D09G0181,Gh_A07G0022,Gh_A11G1802,Gh_D11G2919,Gh_A11G1380,Gh_A07G1077,Gh_A05G1492,Gh_A05G1734,Gh_A09G1399,Gh_…
	GO:0009963	positive regulation of flavonoid biosynthetic process	0.0026489	Gh_A05G3601,Gh_A04G0265,Gh_A07G0236,Gh_D07G1679,Gh_D11G0139,Gh_A04G0160,Gh_D04G0893,Gh_D02G0404,Gh_D03G1849,Gh_A05G1005,Gh_A08G1488,Gh_A12G2265,Gh_D11G1009,Gh_D05G1123,Gh_D08G2013,Gh_A05G1718,Gh_D01G0474,Gh_D03G1601,Gh_D05G3434,Gh_A04G0155,Gh_D05G3558,Gh_A03G0010,Gh_A04G0460,Gh_D13G2490,Gh_A05G3782,Gh_D09G2147,Gh_D03G1764,Gh_A10G1345,Gh_A01G0964,Gh_A08G0594,Gh_A05G0451
	GO:0009808	lignin metabolic process	0.0033047	Gh_D03G1419,Gh_D13G0232,Gh_D08G1135,Gh_A08G0993,Gh_A09G0262,Gh_A04G1207,Gh_A01G1948,Gh_A13G0989,Gh_D08G0952,Gh_D10G2466,Gh_D11G0772,Gh_D02G2146,Gh_A10G0141,Gh_A08G0826,Gh_D10G1769,Gh_D08G1266,Gh_D09G1454,Gh_D10G2461,Gh_A09G0630,Gh_D03G0457,Gh_D04G1243,Gh_A05G1579,Gh_A10G1518,Gh_D13G0255,Gh_A03G2176,Gh_D05G0154,Gh_D09G0628,Gh_A11G2936,Gh_D11G3322,Gh_D05G1123,Gh_D05G2629,Gh_A05G1005,Gh_A03G0166,Gh_…
	GO:0016131	brassinosteroid metabolic process	0.0035185	Gh_A01G0606,Gh_A08G0457,Gh_D04G1038,Gh_D10G1780,Gh_A02G0879,Gh_D01G1723,Gh_D11G0941,Gh_D05G0646,Gh_D05G0184,Gh_A07G0648,Gh_D07G0724,Gh_D04G1238,Gh_D01G0619,Gh_A05G0525,Gh_A03G0129,Gh_D05G0189,Gh_A07G2174,Gh_D08G0591,Gh_A03G2157,Gh_D05G1933,Gh_A05G0122,Gh_A07G0812,Gh_A11G0640,Gh_A03G2176,Gh_D13G2360,Gh_A07G1710,Gh_A02G0266,Gh_D10G1114,Gh_D02G1993,Gh_A01G1485,Gh_D07G0873,Gh_D08G0544,Gh_D06G0296,Gh_…
	GO:0016128	phytosteroid metabolic process	0.0035185	Gh_A09G0022,Gh_D12G1982,Gh_A09G1748,Gh_D09G2194,Gh_D06G0296,Gh_D07G0873,Gh_A01G1485,Gh_D08G0544,Gh_A12G1811,Gh_D03G0111,Gh_A13G1964,Gh_D08G0019,Gh_A05G0127,Gh_A07G1077,Gh_D02G2146,Gh_D09G1857,Gh_D08G1604,Gh_A06G0351,Gh_D05G1811,Gh_A11G1380,Gh_A05G0525,Gh_D01G0619,Gh_D05G0189,Gh_A07G2174,Gh_A03G0129,Gh_D07G0724,Gh_D04G1238,Gh_A02G0879,Gh_D11G0941,Gh_D05G0646,Gh_D01G1723,Gh_D05G0184,Gh_A07G0648,Gh_…
	GO:1901430	positive regulation of syringal lignin biosynthetic process	0.0041928	Gh_D03G1419,Gh_A03G0166,Gh_D08G1266,Gh_A08G0993
	GO:1901428	regulation of syringal lignin biosynthetic process	0.0041928	Gh_D03G1419,Gh_A03G0166,Gh_D08G1266,Gh_A08G0993
	GO:0048765	root hair cell differentiation	0.0041928	Gh_A06G1836,Gh_A05G1599,Gh_A03G2165,Gh_A09G0630,Gh_A05G2653,Gh_D10G1702,Gh_A05G1125,Gh_D04G0074,Gh_D06G2276,Gh_D11G0447,Gh_D07G1517,Gh_D10G0564,Gh_D02G1726,Gh_D07G1105,Gh_D12G2171,Gh_D09G0628,Gh_A05G2315,Gh_A05G0264,Gh_A12G0426,Gh_A03G1286,Gh_A12G2049,Gh_D10G1111,Gh_A03G1222,Gh_D13G2360,Gh_A05G3533,Gh_A07G1332,Gh_D05G1283,Gh_A03G2182,Gh_A07G1847,Gh_A10G1075,Gh_D02G1656,Gh_D09G0181,Gh_A08G1599,Gh_…
	GO:1901066	syringal lignin biosynthetic process	0.0041928	Gh_A03G0166,Gh_D08G1266,Gh_A08G0993,Gh_D03G1419
	GO:1901064	syringal lignin metabolic process	0.0041928	Gh_A03G0166,Gh_A08G0993,Gh_D08G1266,Gh_D03G1419
	GO:0048764	trichoblast maturation	0.0041928	Gh_D05G3049,Gh_Sca091430G01,Gh_D03G0544,Gh_A02G0879,Gh_A04G0767,Gh_D11G2876,Gh_A09G0124,Gh_D05G1342,Gh_A08G0896,Gh_D02G0905,Gh_A05G1759,Gh_D08G1846,Gh_A03G0129,Gh_D13G0255,Gh_Sca074481G01,Gh_D01G1302,Gh_D08G2355,Gh_D07G1541,Gh_A01G0900,Gh_A10G1518,Gh_A09G1746,Gh_A07G1625,Gh_D03G0098,Gh_A11G0504,Gh_D02G2369,Gh_A08G2296,Gh_D05G1510,Gh_A11G0804,Gh_A05G1621,Gh_A07G2351,Gh_A03G2005,Gh_D12G2774,Gh_A03G…
	GO:0015908	fatty acid transport	0.004213	Gh_D11G2007,Gh_D12G0694,Gh_A11G1969,Gh_A12G0689
	GO:0046394	carboxylic acid biosynthetic process	0.0044669	Gh_A13G0518,Gh_A05G0415,Gh_D07G0724,Gh_D12G0266,Gh_D10G1253,Gh_A01G1047,Gh_A06G1910,Gh_A02G0862,Gh_D02G0144,Gh_A02G0294,Gh_A08G0330,Gh_A03G0620,Gh_D01G0573,Gh_A10G1541,Gh_A05G0219,Gh_A08G2343,Gh_D10G1712,Gh_A12G2673,Gh_A02G0242,Gh_D12G0199,Gh_A06G0128,Gh_A02G1655,Gh_D09G0045,Gh_A06G1840,Gh_A09G1748,Gh_D05G2340,Gh_A10G1835,Gh_A02G1613,Gh_A04G0460,Gh_A05G3948,Gh_D04G0513,Gh_A03G1114,Gh_D01G0045,Gh_…
	GO:0016053	organic acid biosynthetic process	0.0044669	Gh_D10G2125,Gh_A03G1219,Gh_D09G0908,Gh_D01G0045,Gh_A10G0504,Gh_A11G0165,Gh_A06G1840,Gh_A09G1748,Gh_A10G1835,Gh_D05G2340,Gh_D09G0045,Gh_D04G0513,Gh_A03G1114,Gh_A05G3948,Gh_A02G1613,Gh_A04G0460,Gh_D01G0573,Gh_A03G0620,Gh_A02G1655,Gh_A06G0128,Gh_D12G0199,Gh_A02G0242,Gh_A10G1541,Gh_A05G0219,Gh_A12G2673,Gh_D10G1712,Gh_A08G2343,Gh_D12G0266,Gh_D10G1253,Gh_D07G0724,Gh_A13G0518,Gh_A05G0415,Gh_D02G0144,Gh_…
	GO:0048469	cell maturation	0.0048369	Gh_D04G0074,Gh_D06G2276,Gh_D02G1726,Gh_D07G1105,Gh_D11G0447,Gh_D07G1517,Gh_D10G0564,Gh_A05G1599,Gh_A06G1836,Gh_A05G2653,Gh_D10G1702,Gh_A05G1125,Gh_A03G2165,Gh_A09G0630,Gh_A05G3533,Gh_A07G1332,Gh_A12G2049,Gh_D10G1111,Gh_D13G2360,Gh_A03G1222,Gh_A10G1075,Gh_A03G2182,Gh_A07G1847,Gh_D02G1656,Gh_D05G1283,Gh_D12G2171,Gh_A05G0264,Gh_A12G0426,Gh_A03G1286,Gh_D09G0628,Gh_A05G2315,Gh_A08G1710,Gh_D07G0159,Gh_…
	GO:0044763	single-organism cellular process	0.0049602	Gh_A03G0620,Gh_D02G0338,Gh_A12G2136,Gh_D11G2087,Gh_D07G2202,Gh_D05G1902,Gh_A05G1005,Gh_D10G0328,Gh_D01G0911,Gh_A02G0242,Gh_A10G1026,Gh_D13G1162,Gh_D08G0846,Gh_A10G0201,Gh_D03G0590,Gh_A11G0965,Gh_A06G0604,Gh_A09G1263,Gh_D02G2366,Gh_D07G1541,Gh_A10G1580,Gh_A05G3670,Gh_D11G0784,Gh_A08G0330,Gh_A01G1234,Gh_A12G0969,Gh_A04G0305,Gh_A04G0034,Gh_D07G2318,Gh_D11G0373,Gh_A02G1486,Gh_A09G1716,Gh_A06G0555,Gh_…
	GO:0042044	fluid transport	0.0052768	Gh_D12G1569,Gh_D07G0107,Gh_A09G1270,Gh_D10G1769,Gh_D02G0404,Gh_A07G1077,Gh_A12G2265,Gh_A13G1964,Gh_D01G0474,Gh_A07G0124,Gh_D10G0438,Gh_D05G1626,Gh_A05G3468,Gh_A02G0276,Gh_D11G3268,Gh_A04G0265,Gh_A05G3601,Gh_D02G2146,Gh_D05G1805,Gh_A11G2882,Gh_D05G0432,Gh_D02G0311,Gh_D09G1272,Gh_D05G3434,Gh_D08G1467,Gh_D05G1970,Gh_D08G1096,Gh_A04G0460,Gh_D04G1049,Gh_A10G0613,Gh_D09G2147,Gh_A12G1452,Gh_A09G1529,Gh_…
	GO:0006833	water transport	0.0052768	Gh_A03G2176,Gh_A13G1686,Gh_D11G0139,Gh_A07G1625,Gh_D09G0628,Gh_A02G0242,Gh_A03G0500,Gh_D04G0893,Gh_A09G1529,Gh_D13G2360,Gh_A04G1393,Gh_D09G2057,Gh_D07G0162,Gh_D10G1111,Gh_A05G1621,Gh_A06G0236,Gh_A05G0327,Gh_D11G3324,Gh_A06G1836,Gh_A08G0896,Gh_D02G0341,Gh_D11G0941,Gh_D06G0879,Gh_A09G0630,Gh_A10G1518,Gh_A01G0993,Gh_A03G0129,Gh_A05G2383,Gh_D05G0731,Gh_A07G0213,Gh_D11G3268,Gh_A02G0276,Gh_A05G3468,Gh_…
	GO:0009812	flavonoid metabolic process	0.0092867	Gh_A02G1344,Gh_D09G2147,Gh_D13G2490,Gh_A04G0460,Gh_A03G0010,Gh_D11G1775,Gh_D01G0345,Gh_D05G3434,Gh_A05G3491,Gh_A04G1207,Gh_A12G1838,Gh_A05G0451,Gh_A08G0594,Gh_A05G1647,Gh_D05G2784,Gh_D08G0952,Gh_A08G1593,Gh_D12G1499,Gh_A06G0066,Gh_D05G0654,Gh_D02G0404,Gh_D03G1849,Gh_A10G1345,Gh_D05G3262,Gh_D05G1596,Gh_A12G1376,Gh_D06G0041,Gh_A04G0160,Gh_A01G0030,Gh_A06G1664,Gh_A12G0549,Gh_A05G1718,Gh_D05G1123,Gh_…
	GO:0010054	trichoblast differentiation	0.0098404	Gh_A04G0979,Gh_A02G1486,Gh_D08G0575,Gh_D10G1769,Gh_D08G1375,Gh_A03G0677,Gh_A13G1964,Gh_A07G1448,Gh_D09G1855,Gh_D11G2117,Gh_A05G0819,Gh_D10G0607,Gh_A01G1475,Gh_D03G1302,Gh_A06G0351,Gh_D11G0582,Gh_D04G1899,Gh_A09G0006,Gh_D05G0329,Gh_A02G1417,Gh_D05G1785,Gh_A10G0567,Gh_A02G0365,Gh_D11G0942,Gh_A11G3137,Gh_A07G1418,Gh_D09G2057,Gh_A08G1200,Gh_A02G0513,Gh_D12G2774,Gh_A03G0265,Gh_D10G2082,Gh_A10G1817,Gh_…
	GO:0007165	signal transduction	0.010269	Gh_D02G0832,Gh_A03G0129,Gh_A06G1229,Gh_A03G0793,Gh_A08G2199,Gh_D11G1577,Gh_D08G1586,Gh_A01G0842,Gh_A08G0272,Gh_A07G0232,Gh_D06G1953,Gh_D05G2828,Gh_D11G0314,Gh_A11G3061,Gh_D03G1687,Gh_A12G1376,Gh_D05G3262,Gh_A09G0111,Gh_D01G0196,Gh_D12G2076,Gh_D07G1350,Gh_A08G1834,Gh_A11G2202,Gh_D08G1527,Gh_A02G0056,Gh_D02G1877,Gh_A04G1393,Gh_D08G0109,Gh_D08G1728,Gh_D05G1535,Gh_A11G0504,Gh_D07G0993,Gh_D05G1510,Gh_…
	GO:0009718	anthocyanin-containing compound biosynthetic process	0.01099	Gh_D05G1836,Gh_A05G1647,Gh_D03G0479,Gh_A06G1664,Gh_A08G1593,Gh_A06G0066,Gh_D04G1926,Gh_D03G1849,Gh_D07G0162,Gh_D08G1998,Gh_A11G1616,Gh_D06G0879,Gh_A03G0010,Gh_A02G1344,Gh_D12G1798,Gh_D11G1775,Gh_D08G1902,Gh_A05G3491,Gh_D06G2155,Gh_A12G1838,Gh_A04G1207,Gh_A07G1098,Gh_D06G0041
	GO:0070297	regulation of phosphorelay signal transduction system	0.011073	Gh_A04G0305,Gh_D12G1291,Gh_A08G2220,Gh_A01G2016,Gh_A13G1254,Gh_A11G2273,Gh_A13G1607,Gh_D01G0450,Gh_D01G0133,Gh_D05G3348,Gh_D13G1966
	GO:0097438	exit from dormancy	0.012734	Gh_A08G1344,Gh_D12G2002,Gh_D05G3907,Gh_Sca051315G01,Gh_A05G0782,Gh_D08G1639
	GO:0048838	release of seed from dormancy	0.012734	Gh_D12G2002,Gh_A08G1344,Gh_Sca051315G01,Gh_A05G0782,Gh_D08G1639,Gh_D05G3907
	GO:0010053	root epidermal cell differentiation	0.013713	Gh_D05G1342,Gh_A08G0896,Gh_D02G0905,Gh_A05G1759,Gh_D11G2876,Gh_A04G0767,Gh_A09G0124,Gh_D03G0544,Gh_A02G0879,Gh_A05G3670,Gh_Sca091430G01,Gh_D05G3049,Gh_A06G0604,Gh_A09G1746,Gh_D01G1302,Gh_Sca074481G01,Gh_D08G2355,Gh_D07G1541,Gh_A10G1518,Gh_A01G0900,Gh_D13G0255,Gh_D08G1846,Gh_A03G0129,Gh_D02G2369,Gh_D05G1510,Gh_A08G2296,Gh_A11G0804,Gh_A11G0504,Gh_D03G0098,Gh_A07G1625,Gh_D09G2057,Gh_A08G1200,Gh_A02G…
	GO:1900378	positive regulation of secondary metabolite biosynthetic process	0.015493	Gh_A08G0993,Gh_D08G1266,Gh_A03G0166,Gh_D03G1419
	GO:0044700	single organism signaling	0.016222	Gh_D05G0478,Gh_D05G2072,Gh_D13G0598,Gh_A08G1014,Gh_A08G1262,Gh_D01G2036,Gh_A02G1529,Gh_D12G1569,Gh_A02G0677,Gh_D11G1322,Gh_A12G2493,Gh_A06G1599,Gh_A05G0528,Gh_A13G1607,Gh_D09G0393,Gh_A07G0378,Gh_A12G1091,Gh_D10G0059,Gh_D06G1966,Gh_D06G2156,Gh_D06G0336,Gh_A06G0570,Gh_A04G0590,Gh_D04G1049,Gh_A09G1133,Gh_A10G2123,Gh_A02G1457,Gh_A05G0864,Gh_A05G2211,Gh_D04G1633,Gh_A11G0362,Gh_A05G3396,Gh_A08G0408,Gh_…
	GO:0023052	signaling	0.017475	Gh_A07G1254,Gh_D02G2145,Gh_A05G1843,Gh_A03G1760,Gh_A07G0085,Gh_A06G1806,Gh_D08G1375,Gh_A07G2307,Gh_A12G1947,Gh_D07G1530,Gh_D05G0654,Gh_D01G0133,Gh_D07G0187,Gh_A05G0399,Gh_A12G2380,Gh_A10G1284,Gh_D05G1785,Gh_D08G1467,Gh_D02G1211,Gh_D11G0582,Gh_A11G2882,Gh_A07G0772,Gh_A11G0504,Gh_D08G1728,Gh_D08G0109,Gh_D05G1535,Gh_D09G1710,Gh_A07G0017,Gh_A06G1664,Gh_A04G0301,Gh_D07G0993,Gh_D05G1510,Gh_D08G1527,Gh_…
	GO:0016126	sterol biosynthetic process	0.018646	Gh_A13G1964,Gh_D05G2420,Gh_D10G1114,Gh_A05G0140,Gh_D03G1205,Gh_D03G0412,Gh_A05G1516,Gh_A07G1077,Gh_Sca007466G01,Gh_A08G1751,Gh_D13G2360,Gh_A05G2165,Gh_A06G0351,Gh_D05G0203,Gh_D05G2425,Gh_A03G0129,Gh_A05G1862,Gh_D13G0255,Gh_A03G2073,Gh_D12G0344,Gh_A05G1566,Gh_A03G2065,Gh_A02G0879,Gh_A05G1599,Gh_A12G0322,Gh_D01G1673,Gh_D05G1785,Gh_D11G0563
	GO:0006657	CDP-choline pathway	0.023948	Gh_D05G2583,Gh_A06G1008,Gh_A05G2088,Gh_D05G2340
	GO:0016125	sterol metabolic process	0.025763	Gh_D05G0203,Gh_A06G0351,Gh_A05G2165,Gh_D13G2360,Gh_Sca007466G01,Gh_A08G1751,Gh_A07G1459,Gh_A07G1077,Gh_D03G0412,Gh_A05G1516,Gh_A13G1964,Gh_D05G2420,Gh_D10G1114,Gh_D03G1205,Gh_A05G0140,Gh_D05G1785,Gh_D11G0563,Gh_D01G1673,Gh_A12G0322,Gh_A05G1599,Gh_A02G0879,Gh_D12G0344,Gh_A03G2065,Gh_A05G1566,Gh_A03G2073,Gh_A05G1862,Gh_D13G0255,Gh_A03G0129,Gh_D05G2425
	GO:0016132	brassinosteroid biosynthetic process	0.029678	Gh_D09G1857,Gh_D02G2146,Gh_A06G0351,Gh_D05G1811,Gh_A11G1380,Gh_A12G1811,Gh_D03G0111,Gh_A13G1964,Gh_D08G0019,Gh_A05G0127,Gh_A07G1077,Gh_D07G0873,Gh_A01G1485,Gh_D08G0544,Gh_A09G0022,Gh_D09G2194,Gh_D12G1982,Gh_D06G0296,Gh_A09G1748,Gh_D08G0591,Gh_A03G2157,Gh_D05G1933,Gh_A11G0640,Gh_A03G2176,Gh_A07G0812,Gh_A02G0266,Gh_D02G1993,Gh_D10G1114,Gh_D13G2360,Gh_A07G1710,Gh_A02G0879,Gh_D11G0941,Gh_D05G0646,Gh_…
	GO:0016129	phytosteroid biosynthetic process	0.029678	Gh_A08G0457,Gh_D10G1780,Gh_A02G0879,Gh_D11G0941,Gh_D05G0646,Gh_D01G1723,Gh_A07G0648,Gh_D07G0724,Gh_D04G1238,Gh_A05G0525,Gh_A03G0129,Gh_D05G0189,Gh_A07G2174,Gh_A03G2157,Gh_D08G0591,Gh_D05G1933,Gh_A07G0812,Gh_A11G0640,Gh_A03G2176,Gh_D13G2360,Gh_A07G1710,Gh_A02G0266,Gh_D10G1114,Gh_D02G1993,Gh_A01G1485,Gh_D07G0873,Gh_D08G0544,Gh_D12G1982,Gh_D09G2194,Gh_D06G0296,Gh_A09G1748,Gh_A09G0022,Gh_A11G1380,Gh_…
	GO:0010073	meristem maintenance	0.030018	Gh_A13G0500,Gh_D05G1811,Gh_A05G3634,Gh_D05G1805,Gh_A01G0564,Gh_D07G1925,Gh_A08G1146,Gh_D05G1966,Gh_A12G0411,Gh_A10G0735,Gh_A09G0533,Gh_D10G1437,Gh_D08G0544,Gh_A11G0031,Gh_A07G1607,Gh_D02G0352,Gh_A12G2524,Gh_A05G1594,Gh_D07G1895,Gh_A07G1793,Gh_Sca005023G04,Gh_D09G1534,Gh_D11G3416,Gh_A07G1104,Gh_D09G0628,Gh_D13G0639,Gh_D05G2190,Gh_D05G3251,Gh_D02G2174,Gh_A07G1710,Gh_A07G2085,Gh_D07G0162,Gh_Sca07756…
	GO:0009738	abscisic acid mediated signaling pathway	0.030314	Gh_A03G1760,Gh_D13G0199,Gh_D04G0487,Gh_D04G0612,Gh_D05G1016,Gh_D07G0549,Gh_A05G3147,Gh_D06G1551,Gh_A12G1947,Gh_A13G0531,Gh_A02G0365,Gh_D05G1507,Gh_D08G1467,Gh_A05G3948,Gh_D08G2141,Gh_A04G0460,Gh_D13G2490,Gh_D05G2284,Gh_D08G2140,Gh_A08G1791,Gh_D05G1015,Gh_D05G0339,Gh_D03G1655,Gh_D12G0051,Gh_D06G0645,Gh_D08G0109,Gh_D09G1024,Gh_D04G0893,Gh_Sca051315G01,Gh_D12G2076,Gh_D05G1342,Gh_A06G1910,Gh_D11G0314…
	GO:0010089	xylem development	0.030314	Gh_D11G1626,Gh_A13G2180,Gh_A04G0787,Gh_A05G1141,Gh_A06G1849,Gh_A05G1740,Gh_D05G0079,Gh_A12G0442,Gh_D13G0974,Gh_A11G1469,Gh_A07G1104,Gh_A08G0474,Gh_D06G0142,Gh_A07G0196,Gh_A02G1788,Gh_D11G0458,Gh_D03G0919,Gh_D07G0380,Gh_D04G1278,Gh_A06G0671,Gh_D02G1269,Gh_A08G1200,Gh_D05G1935,Gh_A03G0631,Gh_D07G0107
	GO:0009225	nucleotide-sugar metabolic process	0.03108	Gh_A11G0308,Gh_A06G1599,Gh_A05G3665,Gh_D08G0801,Gh_A12G0444,Gh_D02G0251,Gh_A10G1937,Gh_A02G0188,Gh_D10G1364,Gh_D05G0948,Gh_D04G0825,Gh_A05G0701,Gh_D10G0059,Gh_A07G0968,Gh_A09G0864,Gh_A10G0052,Gh_D03G1232,Gh_A05G0827,Gh_D01G0345,Gh_D05G3262,Gh_D07G0599,Gh_D12G1142,Gh_D06G1953,Gh_A12G0555
	GO:0040007	growth	0.031603	Gh_D02G0535,Gh_A11G0385,Gh_D12G1474,Gh_D10G1695,Gh_A07G0664,Gh_A10G0735,Gh_A06G1559,Gh_D01G0474,Gh_A12G0411,Gh_A09G1270,Gh_D05G1805,Gh_A06G0714,Gh_D02G1726,Gh_D10G0828,Gh_A10G0760,Gh_Sca074602G01,Gh_D04G0074,Gh_A08G0457,Gh_D04G1897,Gh_A07G0050,Gh_D10G1111,Gh_D13G2360,Gh_A03G1222,Gh_D12G1711,Gh_A10G1503,Gh_D05G2190,Gh_A11G1463,Gh_A03G1286,Gh_A12G0426,Gh_Sca005103G03,Gh_D11G0582,Gh_D11G0029,Gh_A12G…
	GO:0010015	root morphogenesis	0.031603	Gh_D13G2360,Gh_A03G1222,Gh_A12G2049,Gh_D10G1111,Gh_A12G0426,Gh_A03G1286,Gh_A05G0264,Gh_A03G1368,Gh_D04G0074,Gh_D06G2276,Gh_D07G1105,Gh_D02G1726,Gh_D10G0564,Gh_D11G0447,Gh_A05G1125,Gh_A09G0630,Gh_A13G2351,Gh_A09G1270,Gh_D07G1925,Gh_D07G1999,Gh_A08G1014,Gh_A05G3814,Gh_D05G1930,Gh_D01G0474,Gh_A03G1543,Gh_A02G1529,Gh_A08G0489,Gh_A05G3634,Gh_D05G1805,Gh_A08G1710,Gh_A12G1091,Gh_D07G0159,Gh_A11G0385,Gh_…
